# Supplementary material for: Shifting from fear to safety through deconditioning-update
Source: eLife. 2020 Jan 30;9:e51207. doi: 10.7554/eLife.51207 (PMC7021486; doi:10.7554/eLife.51207)
Supplement: Figure 1—source data 1. [file elife-51207-fig1-data1.xlsx]

## Sheet: Figure 1
		Fig. 1B - Reactivations
			Day 3
No Footshock										Footshock
Rat	Baseline	%		Tone 1	Tone 2	Tone 3		%		Rat	Baseline	%		Tone 1	Tone 2	Tone 3		%
cx1-R2	24	80		28	30	30		97.7778		cx1-R4	8	26.667		27	27	30		93.3333
cx2-R3	2	6.6667		30	30	30		100		cx2-R2	15	50		28	29	30		96.6667
cx3-R1	19	63.3333		30	30	30		100		cx3-R5	20	66.667		29	29	30		97.7778
cx4-R4	20	66.667		26	30	30		95.5556		cx4-R2	8	26.667		25	30	30		94.4444
cx5-R5	0	0		28	30	30		97.7778		cx6-R4	0	0		28	27	30		94.4444
cx6-R3	2	6.6667		30	30	30		100		cx7-R4	25	83.333		15	30	30		83.3333
cx7-R1	22	73.3333		30	30	30		100
			Day 4
No Footshock										Footshock
Rat	Baseline	%		Tone 1	Tone 2	Tone 3		%		Rat	Baseline	%		Tone 1	Tone 2	Tone 3		%
cx1-R2	28	93.3333		27	30	30		96.6667		cx1-R4	12	40		25	29	26		88.8889
cx2-R3	27	90		27	30	29		95.5556		cx2-R2	0	0		27	24	29		88.8889
cx3-R1	21	70		29	29	30		97.7778		cx3-R5	27	90		13	30	27		77.7778
cx4-R4	12	40		22	30	30		91.1111		cx4-R2	19	63.333		22	30	29		90
cx5-R5	20	66.667		29	30	30		98.8889		cx6-R4	4	13.3333		29	29	30		97.7778
cx6-R3	22	73.333		27	30	30		96.6667		cx7-R4	5	16.667		26	30	30		95.5556
cx7-R1	12	40		18	30	30		86.6667
			Day 5
No Footshock										Footshock
Rat	Baseline	%		Tone 1	Tone 2	Tone 3		%		Rat	Baseline	%		Tone 1	Tone 2	Tone 3		%
cx1-R2	24	80		23	30	30		92.2222		cx1-R4	26	86.667		15	10	4		32.2222
cx2-R3	20	66.667		28	25	28		90		cx2-R2	11	36.667		17	19	7		47.7778
cx3-R1	0	0		18	28	29		83.3333		cx3-R5	10	33.333		16	24	20		66.6667
cx4-R4	24	80		25	29	27		90		cx4-R2	26	86.667		13	27	4		48.8889
cx5-R5	21	70		19	23	26		75.5556		cx6-R4	16	53.333		24	24	15		70
cx6-R3	29	96.667		27	29	30		95.5556		cx7-R4	22	73.3333		22	29	21		80
cx7-R1	27	90		25	28	30		92.2222
			Day 6
No Footshock										Footshock
Rat	Baseline	%		Tone 1	Tone 2	Tone 3		%		Rat	Baseline	%		Tone 1	Tone 2	Tone 3		%
cx1-R2	12	40		28	28	28		93.3333		cx1-R4	13	43.3333		2	0	1		3.33333
cx2-R3	23	76.667		26	17	16		65.5556		cx2-R2	28	93.3333		7	13	13		36.6667
cx3-R1	23	76.667		26	28	24		86.6667		cx3-R5	6	20		6	11	13		33.3333
cx4-R4	14	46.667		18	23	10		56.6667		cx4-R2	14	46.667		7	0	0		7.77778
cx5-R5	0	0		3	4	0		7.77778		cx6-R4	2	6.6667		14	6	0		22.2222
cx6-R3	22	73.3333		25	29	7		67.7778		cx7-R4	19	63.333		21	22	1		48.8889
cx7-R1	10	33.3333		27	26	26		87.7778
		Fig. 1C - Test
			Test
Control										Footshock										No Footshock
Rat	Baseline	%		Tone 1	Tone 2	Tone 3		%		Rat	Baseline	%		Tone 1	Tone 2	Tone 3		%		Rat	Baseline	%		Tone 1	Tone 2	Tone 3		%
cx1-R1	17	56.667		29	28	28		94.4444		cx1-R4	0	0		19	16	0		38.8889		cx1-R2	10	33.3333		28	26	21		83.3333
cx2-R5	10	33.3333		27	29	29		94.4444		cx2-R2	6	20		25	24	23		80		cx2-R3	5	16.667		29	28	8		72.2222
cx3-R4	4	13.3333		25	30	29		93.3333		cx3-R5	2	6.6667		0	0	0		0		cx3-R1	3	10		23	28	28		87.7778
cx4-R3	25	83.3333		26	30	30		95.5556		cx4-R2	0	0		1	3	0		4.44444		cx4-R4	15	50		25	27	20		80
cx5-R1	23	76.6667		24	28	30		91.1111		cx6-R4	0	0		5	0	0		5.55556		cx5-R5	0	0		8	13	6		30
cx6-R2	26	86.6667		29	30	30		98.8889		cx7-R4	5	16.6667		16	1	0		18.8889		cx6-R3	5	16.667		21	27	30		86.6667
cx7-R2	18	60		27	28	30		94.4444												cx7-R1	15	50		25	26	18		76.6667
																							25.2382
																							19.6126
		Fig. 1D - Renewal																					7.41287
			Renewal
Control										Footshock										No Footshock
Rat	Baseline	%		Tone 1	Tone 2	Tone 3		%		Rat	Baseline	%		Tone 1	Tone 2	Tone 3		%		Rat	Baseline	%		Tone 1	Tone 2	Tone 3		%
cx1-R1	20	66.6667		25	30	26		90		cx1-R4	0	0		19	7	0		28.8889		cx1-R2	28	93.3333		26	29	30		94.4444
cx2-R5	19	63.333		29	28	27		93.3333		cx2-R2	0	0		0	4	0		4.44444		cx2-R3	6	20		25	5	9		43.3333
cx3-R4	23	76.667		27	30	30		96.6667		cx3-R5	22	73.333		1	0	0		1.11111		cx3-R1	12	40		27	24	23		82.2222
cx4-R3	0	0		19	30	30		87.7778		cx4-R2	6	20		2	0	3		5.55556		cx4-R4	16	53.3333		17	8	0		27.7778
cx5-R1	25	83.3333		28	30	30		97.7778		cx6-R4	0	0		0	0	0		0		cx5-R5	24	80		17	11	4		35.5556
cx6-R2	22	73.3333		30	28	28		95.5556		cx7-R4	7	23.3333		15	2	0		18.8889		cx6-R3	6	20		25	28	27		88.8889
cx7-R2	26	86.6667		27	28	30		94.4444												cx7-R1	17	56.6667		27	27	29		92.2222
																							45
																							23.2618
		Fig. 1E - Spontaneous Recovery																					8.79213
			Spontaneous Recovery
Control										Footshock										No Footshock
Rat	Baseline	%		Tone 1	Tone 2	Tone 3		%		Rat	Baseline	%		Tone 1	Tone 2	Tone 3		%		Rat	Baseline	%		Tone 1	Tone 2	Tone 3		%
cx1-R1	21	70		12	30	20		68.8889		cx1-R4	0	0		9	6	0		16.6667		cx1-R2	0	0		25	27	23		83.3333
cx2-R5	25	83.3333		16	17	5		42.2222		cx2-R2	21	70		13	9	0		24.4444		cx2-R3	18	60		21	2	0		25.5556
cx3-R4	7	23.3333		16	25	28		76.6667		cx3-R5	3	10		2	1	0		3.33333		cx3-R1	4	13.3333		22	27	10		65.5556
cx4-R3	20	66.6667		18	29	29		84.4444		cx4-R2	14	46.6667		8	2	0		11.1111		cx4-R4	13	43.3333		21	21	15		63.3333
cx5-R1	27	90		25	27	28		88.8889		cx6-R4	2	6.6667		2	1	0		3.33333		cx5-R5	0	0		17	5	8		33.3333
cx6-R2	14	46.667		19	27	25		78.8889		cx7-R4	24	80		18	16	0		37.7778		cx6-R3	14	46.6667		22	15	8		50
cx7-R2	29	96.667		28	30	27		94.4444												cx7-R1	4	13.3333		22	28	28		86.6667
		Fig. 1G - Reactivations
			Day 3
No Footshock										Footshock
Rat	Baseline	%		Tone 1	Tone 2	Tone 3		%		Rat	Baseline	%		Tone 1	Tone 2	Tone 3		%
cx99-R2	15	50		28	29	30		96.6667		cx99-R1	0	0		29	20	27		84.4444
cx99-R3	20	66.667		22	29	30		90		cx100-R1	0	0		26	16	26		75.5556
cx100-R3	17	56.667		10	30	30		77.7778		cx100-R2	4	13.3333		21	22	28		78.8889
cx101-R1	29	96.667		24	30	30		93.3333		cx101-R2	26	86.6667		28	30	28		95.5556
cx101-R5	20	66.667		24	25	27		84.4444		cx101-R4	0	0		14	27	30		78.8889
cx102-R2	0	0		25	29	30		93.3333		cx102-R1	0	0		20	29	28		85.5556
cx102-R4	19	63.3333		28	27	26		90		cx102-R5	14	46.6667		26	22	26		82.2222
			Day 4
No Footshock										Footshock
Rat	Baseline	%		Tone 1	Tone 2	Tone 3		%		Rat	Baseline	%		Tone 1	Tone 2	Tone 3		%
cx99-R2	28	93.3333		29	30	30		98.8889		cx99-R1	6	20		15	9	16		44.4444
cx99-R3	0	0		16	18	26		66.6667		cx100-R1	0	0		22	23	17		68.8889
cx100-R3	0	0		10	23	16		54.4444		cx100-R2	0	0		1	4	6		12.2222
cx101-R1	27	90		28	27	29		93.3333		cx101-R2	0	0		22	22	23		74.3333
cx101-R5	0	0		19	24	20		70		cx101-R4	0	0		17	25	24		73.3333
cx102-R2	14	46.667		15	26	27		75.5556		cx102-R1	0	0		8	16	12		40
cx102-R4	0	0		20	20	22		68.8889		cx102-R5	0	0		8	9	21		42.2222
			Day 5
No Footshock										Footshock
Rat	Baseline	%		Tone 1	Tone 2	Tone 3		%		Rat	Baseline	%		Tone 1	Tone 2	Tone 3		%
cx99-R2	0	0		22	27	28		85.5556		cx99-R1	0	0		11	18	21		55.5556
cx99-R3	18	60		26	21	13		66.6667		cx100-R1	0	0		19	19	12		55.5556
cx100-R3	0	0		11	8	24		47.7778		cx100-R2	0	0		0	2	2		4.44444
cx101-R1	0	0		24	26	27		85.5556		cx101-R2	22	73.3333		15	22	10		52.2222
cx101-R5	0	0		14	3	4		23.3333		cx101-R4	0	0		12	8	7		30
cx102-R2	15	50		15	23	3		45.5556		cx102-R1	0	0		0	0	0		0
cx102-R4	0	0		14	12	10		40		cx102-R5	0	0		9	8	2		21.1111
			Day 6
No Footshock										Footshock
Rat	Baseline	%		Tone 1	Tone 2	Tone 3		%		Rat	Baseline	%		Tone 1	Tone 2	Tone 3		%
cx99-R2	0	0		23	23	23		76.6667		cx99-R1	0	0		13	12	4		32.2222
cx99-R3	17	56.6667		14	22	5		45.5556		cx100-R1	0	0		22	20	15		63.3333
cx100-R3	0	0		5	6	0		12.2222		cx100-R2	2	6.6667		2	4	3		10
cx101-R1	2	6.6667		16	26	24		73.3333		cx101-R2	0	0		20	19	16		61.1111
cx101-R5	0	0		2	0	1		3.33333		cx101-R4	0	0		11	3	9		25.5556
cx102-R2	0	0		12	21	20		58.8889		cx102-R1	0	0		1	0	0		1.11111
cx102-R4	0	0		10	10	3		25.5556		cx102-R5	0	0		2	2	2		6.66667
		Fig. 1H - Test
			Test
Control										Footshock										No Footshock
Rat	Baseline	%		Tone 1	Tone 2	Tone 3		%		Rat	Baseline	%		Tone 1	Tone 2	Tone 3		%		Rat	Baseline	%		Tone 1	Tone 2	Tone 3		%
cx99-R4	2	6.6667		29	27	29		94.4444		cx99-R1	0	0		14	12	10		40		cx99-R2	0	0		29	29	28		95.5556
cx99-R5	15	50		21	30	30		90		cx100-R1	0	0		20	20	7		52.2222		cx99-R3	0	0		18	22	2		46.6667
cx100-R4	4	13.3333		30	29	30		98.8889		cx100-R2	0	0		4	0	0		4.44444		cx100-R3	0	0		7	10	2		21.1111
cx100-R5	28	93.3333		30	30	30		100		cx101-R2	0	0		20	10	5		38.8889		cx101-R1	19	63.3333		28	30	27		94.4444
cx101-R3	28	93.3333	57.2222	29	30	29		97.7778		cx101-R4	0	0		2	1	0		3.33333		cx101-R5	0	0		4	1	4		10
cx102-R3	26	86.6667	40.0231	30	30	30		100		cx102-R1	0	0		0	0	0		0		cx102-R2	0	0		23	20	5		53.3333
			16.3394							cx102-R5	0	0		4	0	0		4.44444		cx102-R4	0	0		19	13	7		43.3333
		Fig. 1I - Renewal
			Renewal
Control										Footshock										No Footshock
Rat	Baseline	%		Tone 1	Tone 2	Tone 3		%		Rat	Baseline	%		Tone 1	Tone 2	Tone 3		%		Rat	Baseline	%		Tone 1	Tone 2	Tone 3		%
cx99-R4	15	50		30	30	30		100		cx99-R1	0	0		6	1	0		7.77778		cx99-R2	21	70		29	30	28		96.6667
cx99-R5	2	66.6667		29	30	30		98.8889		cx100-R1	0	0		10	8	4		24.4444		cx99-R3	20	66.6667		21	20	19		66.6667
cx100-R4	0	0		28	30	28		95.5556		cx100-R2	0	0		1	1	0		2.22222		cx100-R3	0	0		15	20	15		55.5556
cx100-R5	0	0		29	29	30		97.7778		cx101-R2	10	33.3333		14	7	0		23.3333		cx101-R1	15	50		29	30	30		98.8889
cx101-R3	30	100		29	30	30		98.8889		cx101-R4	5	16.6667		17	10	0		30		cx101-R5	0	0		11	15	4		33.3333
cx102-R3	30	100		28	30	30		97.7778		cx102-R1	0	0		0	0	0		0		cx102-R2	2	6.6667		15	30	13		64.4444
										cx102-R5	0	0		0	0	4		4.44444		cx102-R4	0	0		12	9	17		42.2222
		Fig. 1J - Spontaneous Recovery
			Spontaneous Recovery
Control										Footshock										No Footshock
Rat	Baseline	%		Tone 1	Tone 2	Tone 3		%		Rat	Baseline	%		Tone 1	Tone 2	Tone 3		%		Rat	Baseline	%		Tone 1	Tone 2	Tone 3		%
cx99-R4	0	0		23	30	26		87.7778		cx99-R1	0	0		16	4	0		22.2222		cx99-R2	0	0		29	29	29		96.6667
cx99-R5	0	0		26	30	28		93.3333		cx100-R1	0	0		9	1	6		17.7778		cx99-R3	0	0		27	24	15		73.3333
cx100-R4	0	0		26	28	24		86.6667		cx100-R2	0	0		10	0	0		11.1111		cx100-R3	0	0		14	12	10		40
cx100-R5	0	0		27	30	30		96.6667		cx101-R2	0	0		10	1	2		14.4444		cx101-R1	20	66.667		27	29	30		95.5556
cx101-R3	13	43.3333		27	26	30		92.2222		cx101-R4	0	0		1	0	0		1.11111		cx101-R5	0	0		27	0	7		37.7778
cx102-R3	0	0		29	29	29		96.6667		cx102-R1	0	0		14	0	0		15.5556		cx102-R2	0	0		13	14	10		41.1111
										cx102-R5	0	0		7	5	0		13.3333		cx102-R4	0	0		29	22	19		77.7778
		Fig. 1K - Retraining
			Retraining
Control										Footshock										No Footshock
Rat	Baseline	%		Tone 1	Tone 2	Tone 3		%		Rat	Baseline	%		Tone 1	Tone 2	Tone 3		%		Rat	Baseline	%		Tone 1	Tone 2	Tone 3		%
cx99-R4	0	0		28	22	30		88.8889		cx99-R1	3	10		12	12	8		35.5556		cx99-R2	20	66.6667		21	26	27		82.2222
cx99-R5	0	0		27	27	30		93.3333		cx100-R1	0	0		7	15	7		32.2222		cx99-R3	9	30		18	22	28		75.5556
cx100-R4	0	0		28	28	20		84.4444		cx100-R2	2	6.6667		5	9	9		25.5556		cx100-R3	0	0		10	17	20		52.2222
cx100-R5	20	66.667		29	30	30		98.8889		cx101-R2	10	33.3333		17	16	6		43.3333		cx101-R1	9	30		18	26	21		72.2222
cx101-R3	20	66.667		27	28	30		94.4444		cx101-R4	0	0		7	10	1		20		cx101-R5	0	0		15	13	17		50
cx102-R3	12	40		27	30	21		87.7778		cx102-R1	0	0		17	20	18		61.1111		cx102-R2	0	0		21	29	29		87.7778
										cx102-R5	0	0		4	0	14		20		cx102-R4	0	0		29	30	30		98.8889

## Sheet: Figure 1-figure supplement 1
		Fig. S1B - Reactivations
			Day 3
No Footshock										Footshock
Rat	Baseline	%		Tone 1	Tone 2	Tone 3		%		Rat	Baseline	%		Tone 1	Tone 2	Tone 3		%
cx241-R1	0	0		6	19	13		42.2222		cx241-R2	0	0		18	30	30		86.6667
cx241-R4	21	70		29	30	28		96.6667		cx242-R1	20	66.6667		28	28	28		93.3333
cx242-R3	16	53.333		20	29	24		81.1111		cx242-R4	16	53.3333		17	27	15		65.5556
cx243-R2	4	13.333		25	30	30		94.4444		cx243-R3	5	16.6667		30	30	25		94.4444
cx244-R1	20	66.6667		28	30	30		97.7778		cx244-R2	0	0		10	18	11		43.3333
cx244-R4	0	0		30	30	30		100		cx245-R1	15	50		30	30	30		100
cx245-R3	28	93.3333		30	30	30		100		cx245-R4	26	86.6667		30	22	30		91.1111
			Day 4
No Footshock										Footshock
Rat	Baseline	%		Tone 1	Tone 2	Tone 3		%		Rat	Baseline	%		Tone 1	Tone 2	Tone 3		%
cx241-R1	0	0		8	6	6		22.2222		cx241-R2	12	40		27	30	30		96.6667
cx241-R4	0	0		23	25	24		80		cx242-R1	23	76.667		22	29	29		88.8889
cx242-R3	5	16.6667		20	25	20		72.2222		cx242-R4	0	0		24	20	27		78.8889
cx243-R2	16	53.3333		25	28	26		87.7778		cx243-R3	20	66.6667		21	25	10		62.2222
cx244-R1	19	63.3333		18	26	24		75.5556		cx244-R2	15	50		16	22	13		56.6667
cx244-R4	2	6.6667		26	25	20		78.8889		cx245-R1	15	50		24	30	30		93.3333
cx245-R3	19	63.3333		20	23	20		70		cx245-R4	6	20		27	16	30		81.1111
			Day 5
No Footshock										Footshock
Rat	Baseline	%		Tone 1	Tone 2	Tone 3		%		Rat	Baseline	%		Tone 1	Tone 2	Tone 3		%
cx241-R1	3	10		4	0	0		4.44444		cx241-R2	6	20		22	30	30		91.1111
cx241-R4	0	0		25	21	3		54.4444		cx242-R1	23	76.6667		19	27	14		66.6667
cx242-R3	19	63.3333		15	20	10		50		cx242-R4	0	0		20	27	26		81.1111
cx243-R2	0	0		24	29	27		88.8889		cx243-R3	16	53.3333		16	29	28		81.1111
cx244-R1	23	76.6667		20	20	7		52.2222		cx244-R2	28	93.3333		16	23	29		75.5556
cx244-R4	0	0		24	19	17		66.6667		cx245-R1	17	56.6667		20	30	29		87.7778
cx245-R3	0	0		19	24	25		75.5556		cx245-R4	29	96.667		18	30	30		86.6667
			Day 6
No Footshock										Footshock
Rat	Baseline	%		Tone 1	Tone 2	Tone 3		%		Rat	Baseline	%		Tone 1	Tone 2	Tone 3		%
cx241-R1	0	0		0	0	0		0		cx241-R2	17	56.6667		29	30	19		86.6667
cx241-R4	3	10		24	15	6		50		cx242-R1	0	0		22	12	10		48.8889
cx242-R3	14	46.667		24	15	19		64.4444		cx242-R4	0	0		20	24	23		74.4444
cx243-R2	0	0		25	16	18		65.5556		cx243-R3	18	60		22	25	13		66.6667
cx244-R1	0	0		9	2	1		13.3333		cx244-R2	16	53.3333		23	10	16		54.4444
cx244-R4	0	0		8	5	0		14.4444		cx245-R1	2	6.6667		27	29	29		94.4444
cx245-R3	0	0		15	24	22		67.7778		cx245-R4	0	0		26	30	29		94.4444
		Fig. S1C - Test
			Test
Control										Footshock										No Footshock
Rat	Baseline	%		Tone 1	Tone 2	Tone 3		%		Rat	Baseline	%		Tone 1	Tone 2	Tone 3		%		Rat	Baseline	%		Tone 1	Tone 2	Tone 3		%
cx241-R3	30	100		29	30	26		94.4444		cx241-R2	0	0		27	28	30		94.4444		cx241-R1	0	0		0	2	0		2.22222
cx242-R2	10	33.3333		30	30	30		100		cx242-R1	0	0		26	18	30		82.2222		cx241-R4	0	0		14	17	20		56.6667
cx243-R1	30	100		30	30	30		100		cx242-R4	14	46.667		28	25	30		92.2222		cx242-R3	8	26.6667		29	30	28		96.6667
cx243-R4	30	100		28	29	30		96.6667		cx243-R3	24	80		26	20	25		78.8889		cx243-R2	0	0		24	26	15		72.2222
cx244-R3	7	23.333		30	28	30		97.7778		cx244-R2	19	63.3333		27	30	30		96.6667		cx244-R1	0	0		3	20	7		33.3333
cx245-R2	30	100		29	30	30		98.8889		cx245-R1	30	100		30	30	30		100		cx244-R4	0	0		14	3	0		18.8889
										cx245-R4	17	56.6667		28	30	26		93.3333		cx245-R3	19	56.6667		30	28	24		91.1111

## Sheet: Figure 1-figure supplement 2
		Fig. S2B - Reactivation
			Day 3
No Footshock										Footshock
Rat	Baseline	%		Tone 1	Tone 2	Tone 3		%		Rat	Baseline	%		Tone 1	Tone 2	Tone 3		%
cx611-R2	28	93.3333		13	21	27		67.7778		cx611-R3	12	40		7	27	21		61.1111
cx611-R4	28	93.333		25	27	30		91.1111		cx612-R1	13	43.3333		19	28	27		82.2222
cx612-R3	29	96.6667		2	24	28		60		cx612-R2	17	56.667		21	18	30		76.6667
cx613-R3	29	96.667		2	24	28		60		cx613-R2	23	76.667		13	30	30		81.1111
cx613-R4	0	0		10	30	20		66.6667		cx614-R2	30	100		22	22	23		74.4444
cx614-R1	20	66.667		3	23	26		57.7778		cx615-R3	27	90		28	25	26		87.7778
cx615-R1	15	50		16	27	23		73.3333		cx615-R4	2	6.6667		7	28	27		68.8889
		Fig. S2C - Test
			Test
Control										Footshock										No Footshock
Rat	Baseline	%		Tone 1	Tone 2	Tone 3		%		Rat	Baseline	%		Tone 1	Tone 2	Tone 3		%		Rat	Baseline	%		Tone 1	Tone 2	Tone 3		%
cx611-R1	29	96.667		26	26	29		90		cx611-R3	17	56.667		16	8	27		56.6667		cx611-R2	13	43.333		15	22	18		90
cx612-R4	13	43.333		22	29	30		90		cx612-R1	5	16.667		7	24	25		62.2222		cx611-R4	25	83.333		19	28	28		83.3333
cx613-R1	21	70		29	30	30		98.8889		cx612-R2	10	33.3333		16	19	20		61.1111		cx612-R3	5	16.667		20	22	18		66.6667
cx614-R3	30	100		27	30	30		96.6667		cx613-R2	26	86.667		30	30	30		100		cx613-R3	29	96.667		22	30	30		91.1111
cx614-R4	28	93.333		21	28	30		87.7778		cx614-R2	18	60		26	30	30		95.5556		cx613-R4	20	66.667		16	28	17		67.7778
cx615-R2	20	66.667		27	30	30		96.6667		cx615-R3	24	80		28	27	25		88.8889		cx614-R1	29	96.667		19	29	30		86.6667
										cx615-R4	27	90		28	20	28		84.4444		cx615-R1	23	76.667		18	22	26		73.3333
		Fig. S2C - Renewal
			Renewal
Control										Footshock										No Footshock
Rat	Baseline	%		Tone 1	Tone 2	Tone 3		%		Rat	Baseline	%		Tone 1	Tone 2	Tone 3		%		Rat	Baseline	%		Tone 1	Tone 2	Tone 3		%
cx611-R1	30	100		25	27	28		88.8889		cx611-R3	18	60		14	20	1		38.8889		cx611-R2	20	66.6667		9	22	18		54.4444
cx612-R4	3	10		24	28	26		86.6667		cx612-R1	5	16.667		15	14	6		38.8889		cx611-R4	6	20		15	23	22		66.6667
cx613-R1	21	70		17	28	25		77.7778		cx612-R2	7	23.333		12	19	10		45.5556		cx612-R3	7	23.3333		5	1	3		10
cx614-R3	27	90		27	30	30		96.6667		cx613-R2	28	93.333		23	25	30		86.6667		cx613-R3	27	90		23	30	30		92.2222
cx614-R4	18	60		23	18	25		73.3333		cx614-R2	17	56.667		30	29	30		98.8889		cx613-R4	0	0		25	27	29		90
cx615-R2	28	93.333		29	30	25		93.3333		cx615-R3	15	50		29	30	29		97.7778		cx614-R1	25	83.333		19	29	30		84.4444
										cx615-R4	14	46.667		25	28	25		86.6667		cx615-R1	25	83.333		29	30	29		97.7778

## Sheet: Figure 1-figure supplement 3
		Fig. S3B - Test
			Test
Control										Footshock										Devaluation
Rat	Baseline	%		Tone 1	Tone 2	Tone 3		%		Rat	Baseline	%		Tone 1	Tone 2	Tone 3		%		Rat	Baseline	%		Tone 1	Tone 2	Tone 3		%
cx254-R4	29	96.6667		30	30	29		98.8889		cx84-R4	0	0		6	6	7		21.1111		cx254-R3	20	66.6667		28	29	30		96.6667
cx255-R1	28	93.333		30	30	30		100		cx85-R2	0	0		0	2	3		5.55556		cx255-R4	30	100		29	29	30		97.7778
cx256-R2	30	100		29	30	30		98.8889		cx85-R3	8	26.667		0	3	1		4.44444		cx256-R1	22	73.333		21	30	30		90
cx257-R3	26	86.6667		25	30	30		94.4444		cx86-R1	18	60		17	13	14		48.8889		cx257-R2	0	0		16	29	29		82.2222
cx258-R4	28	93.333		26	29	28		92.2222		cx86-R3	24	80		25	28	28		90		cx258-R3	0	0		12	21	29		68.8889
cx259-R1	27	90		25	30	29		93.3333		cx87-R2	0	0		10	5	0		16.6667		cx259-R4	26	86.6667		20	18	30		75.5556
cx260-R2	30	100		29	30	30		98.8889		cx88-R1	6	20		15	13	11		43.3333		cx260-R1	1	3.3333		22	30	30		91.1111
		Fig. S3D - Reactivations
			Day 3
No Footshock										Footshock
Rat	Baseline	%		Tone 1	Tone 2	Tone 3		%		Rat	Baseline	%		Tone 1	Tone 2	Tone 3		%
cx254-R1	2	66.6667		27	30	30		96.6667		cx254-R2	24	80		30	30	30		100
cx255-R2	30	100		30	30	30		100		cx255-R3	30	100		30	30	30		100
cx256-R3	30	100		13	30	28		78.8889		cx256-R4	30	100		30	30	30		100
cx257-R4	2	6.6667		27	29	28		93.3333		cx257-R1	26	86.6667		25	30	30		94.4444
cx258-R1	23	76.6667		20	30	30		88.8889		cx258-R2	0	0		21	30	30		90
cx259-R2	0	0		19	30	30		87.7778		cx259-R3	19	63.3333		26	30	7		70
cx260-R3	25	83.3333		28	30	30		97.7778		cx260-R4	28	93.3333		26	30	30		95.5556
cx261-R3	10	33.3333		29	30	30		98.8889		cx261-R2	5	16.6667		28	30	30		97.7778
cx261-R4	26	86.6667		30	30	30		100		cx262-R2	30	100		26	30	30		95.5556
cx262-R1	27	90		29	30	30		98.8889		cx262-R4	25	83.3333		21	30	30		90
			Day 4
No Footshock										Footshock
Rat	Baseline	%		Tone 1	Tone 2	Tone 3		%		Rat	Baseline	%		Tone 1	Tone 2	Tone 3		%
cx254-R1	25	83.3333		30	30	30		100		cx254-R2	19	63.3333		20	29	28		85.5556
cx255-R2	30	100		29	30	30		98.8889		cx255-R3	26	86.6667		21	30	28		87.7778
cx256-R3	16	53.333		26	10	28		71.1111		cx256-R4	2	6.6667		11	24	29		71.1111
cx257-R4	15	50		29	30	22		90		cx257-R1	28	93.3333		26	27	27		88.8889
cx258-R1	20	66.6667		15	20	20		61.1111		cx258-R2	17	56.6667		25	27	18		77.7778
cx259-R2	16	53.3333		22	22	24		75.5556		cx259-R3	3	10		18	29	20		74.4444
cx260-R3	14	46.6667		24	27	27		86.6667		cx260-R4	30	100		27	28	27		91.1111
cx261-R3	4	13.3333		29	28	30		96.6667		cx261-R2	4	13.3333		27	28	31		95.5556
cx261-R4	15	50		29	30	30		98.89		cx262-R2	24	80		25	30	30		94.4444
cx262-R1	0	0		18	30	28		84.44		cx262-R4	5	16.667		20	30	29		87.7778
			Day 5
No Footshock										Footshock
Rat	Baseline	%		Tone 1	Tone 2	Tone 3		%		Rat	Baseline	%		Tone 1	Tone 2	Tone 3		%
cx254-R1	19	63.333		7	28	14		54.4444		cx254-R2	30	100		29	28	29		95.5556
cx255-R2	28	93.3333		30	30	30		100		cx255-R3	0	0		28	29	30		96.6667
cx256-R3	0	0		8	6	16		33.3333		cx256-R4	0	0		20	9	25		60
cx257-R4	12	40		17	15	18		55.5556		cx257-R1	0	0		20	27	1		53.3333
cx258-R1	17	56.6667		17	6	18		45.5556		cx258-R2	0	0		4	7	13		26.6667
cx259-R2	9	30		27	25	18		77.7778		cx259-R3	0	0		13	26	25		71.1111
cx260-R3	0	0		18	27	26		78.8889		cx260-R4	24	80		20	27	28		83.3333
cx261-R3	7	23.3333		29	25	27		90		cx261-R2	4	13.333		19	15	15		54.4444
cx261-R4	15	50		25	27	27		87.7778		cx262-R2	0	0		17	26	28		78.8889
cx262-R1	3	10		15	27	28		77.7778		cx262-R4	30	100		23	30	24		85.5556
			Day 6
No Footshock										Footshock
Rat	Baseline	%		Tone 1	Tone 2	Tone 3		%		Rat	Baseline	%		Tone 1	Tone 2	Tone 3		%
cx254-R1	0	0		11	4	2		18.8889		cx254-R2	30	100		29	29	30		97.7778
cx255-R2	18	60		27	28	8		70		cx255-R3	0	0		23	28	25		84.4444
cx256-R3	0	0		12	17	6		38.8889		cx256-R4	0	0		19	25	7		56.6667
cx257-R4	0	0		25	24	21		77.7778		cx257-R1	0	0		20	7	1		31.1111
cx258-R1	0	0		21	22	5		53.3333		cx258-R2	0	0		14	8	5		30
cx259-R2	8	26.6667		13	24	13		55.5556		cx259-R3	0	0		15	11	1		30
cx260-R3	20	66.6667		12	21	9		46.6667		cx260-R4	24	80		27	26	26		87.7778
cx261-R3	0	0		27	30	17		82.2222		cx261-R2	22	73.3333		14	2	21		41.1111
cx261-R4	30	100		30	30	30		100		cx262-R2	0	0		26	27	29		73.3333
cx262-R1	3	10		26	27	29		91.1111		cx262-R4	0	0		22	18	21		67.7778
		Fig. S3E - Test
			Test
No Footshock										Footshock
Rat	Baseline	%		Tone 1	Tone 2	Tone 3		%		Rat	Baseline	%		Tone 1	Tone 2	Tone 3		%
cx254-R1	0	0		19	11	20		55.5556		cx254-R2	26	86.6667		27	29	29		94.4444
cx255-R2	30	100		13	11	18		46.6667		cx255-R3	0	0		18	19	30		74.4444
cx256-R3	21	70		28	15	20		70		cx256-R4	0	0		15	12	3		33.3333
cx257-R4	0	0		15	8	6		32.2222		cx257-R1	0	0		10	10	5		27.7778
cx258-R1	6	20		9	3	2		15.5556		cx258-R2	0	0		0	6	0		6.66667
cx259-R2	2	6.6667		25	20	2		52.2222		cx259-R3	0	0		0	0	4		4.44444
cx260-R3	6	20		5	11	18		37.7778		cx260-R4	11	36.6667		22	22	26		77.7778
cx261-R3	0	0		29	30	21		88.8889		cx261-R2	4	13.333		9	4	1		15.5556
cx261-R4	30	100		29	30	30		98.8889		cx262-R2	10	33.3333		18	21	18		63.3333
cx262-R1	0	0		21	15	22		64.4445		cx262-R4	0	0		0	10	24		37.7778
		Fig. S3E - Reinstatement
			reinstatement
No Footshock										Footshock
Rat	Baseline	%		Tone 1	Tone 2	Tone 3		%		Rat	Baseline	%		Tone 1	Tone 2	Tone 3		%
cx254-R1	0	0		18	18	12		53.3333		cx254-R2	30	100		29	25	28		91.1111
cx255-R2	2376.67			30	30	30		100		cx255-R3	0	0		12	7	12		34.4444
cx256-R3	2	6.6667		28	24	20		80		cx256-R4	0	0		14	10	4		31.1111
cx257-R4	10	33.3333		30	27	29		95.5556		cx257-R1	0	0		0	0	0		0
cx258-R1	3	10		16	18	6		44.4444		cx258-R2	0	0		0	9	0		10
cx259-R2	0	0		25	28	20		81.1111		cx259-R3	0	0		0	0	3		3.33333
cx260-R3	0	0		11	5	4		22.2222		cx260-R4	0	0		18	25	24		74.4444
cx261-R3	0	0		22	26	29		85.5556		cx261-R2	0	0		3	2	0		5.55556
cx261-R4	0	0		20	24	26		77.7778		cx262-R2	0	0		12	18	9		43.3333
cx262-R1	0	0		17	20	25		68.8889		cx262-R4	0	0		0	18	11		32.2222

## Sheet: Figure 1-fugure supplement 4
		Fig. S4B - Reactivations																					90.5556				87.6389				72.4306				20.7639
			Day 3																				7.06483				12.0579				18.2524				17.5329
Paired										Unpaired													2.49779				4.2631				6.45321				6.19881
Rat	Baseline	%		Tone 1	Tone 2	Tone 3		%		Rat	Baseline	%		Tone 1	Tone 2	Tone 3		%
cx504-R2	5	16.6667		29	29	25		92.2222		cx504-R1	25	83.3333		27	30	29		95.5556		57	59	57	96.1111	57	59	59	97.2222	58	54	39	83.8889	12	0	0	6.66667
cx504-R4	24	80		27	29	29		94.4444		cx504-R3	12	40		27	30	29		95.5556		59	34	42	75	53	50	51	85.5556	51	47	25	68.3333	3	9	0	6.66667
cx505-R1	30	100		28	29	29		95.5556		cx505-R2	23	76.6667		28	24	29		90		59	53	58	94.4444	59	59	57	97.2222	55	55	47	87.2222	55	30	0	47.2222
cx505-R3	0	0		19	28	29		84.4444		cx505-R4	11	36.6667		17	28	25		77.7778		58	56	50	91.1111	51	30	39	66.6667	18	34	10	34.4444	6	0	0	3.33333
cx506-R3	10	33.3333		26	30	29		94.4444		cx506-R1	15	50		23	29	29		90		59	58	43	88.8889	53	54	22	71.6667	51	57	5	62.7778	32	34	9	41.6667
cx506-R4	25	83.3333		30	28	29		96.6667		cx506-R2	5	16.6667		26	30	29		94.4444		58	59	56	96.1111	59	59	53	95	40	50	38	71.1111	20	0	0	11.1111
cx507-R1	0	0		27	29	30		95.5556		cx507-R3	7	23.3333		28	29	28		94.4444		56	56	59	95	58	59	50	92.7778	59	51	55	91.6667	26	15	21	34.4444
cx507-R2	14	46.6667		27	28	30		94.4444		cx507-R4	18	60		27	28	30		94.4444		50	50	58	87.7778	58	55	58	95	55	40	49	80	10	17	0	15
			Day 4
Paired										Unpaired										41	50	58	82.7778	42	15	30	48.3333	50	41	52	79.4444	44	10	50	57.7778
Rat	Baseline	%		Tone 1	Tone 2	Tone 3		%		Rat	Baseline	%		Tone 1	Tone 2	Tone 3		%		56	58	60	96.6667	57	50	57	91.1111	43	51	50	80	31	50	35	64.4444
cx504-R2	7	23.3333		23	30	29		91.1111		cx504-R1	12	40		28	27	25		88.8889		52	59	59	94.4444	57	51	42	83.3333	50	50	41	78.3333	55	46	30	72.7778
cx504-R4	17	56.6667		28	30	23		90		cx504-R3	22	73.3333		20	27	28		83.3333		59	60	56	97.2222	41	49	34	68.8889	30	47	50	70.5556	35	47	50	73.3333
cx505-R1	24	80		29	28	27		93.3333		cx505-R2	15	50		27	21	21		76.6667		58	60	60	98.8889	60	60	57	98.3333	47	40	40	70.5556	55	49	53	87.2222
cx505-R3	0	0		24	27	27		86.6667		cx505-R4	10	33.3333		21	29	29		87.7778		40	58	58	86.6667	57	55	56	93.3333	49	49	30	71.1111	55	47	50	84.4444
cx506-R3	15	50		25	29	28		91.1111		cx506-R1	15	50		27	30	29		95.5556		47	59	60	92.2222	56	47	54	87.2222	55	51	51	87.2222	47	53	57	87.2222
cx506-R4	27	90		27	29	27		92.2222		cx506-R2	19	63.3333		29	30	28		96.6667		40	58	60	87.7778	40	58	55	85	51	55	50	86.6667	45	47	42	74.4444
cx507-R1	23	76.6667		27	29	27		92.2222		cx507-R3	15	50		28	30	22		88.8889
cx507-R2	0	0		25	29	29		92.2222		cx507-R4	7	23.3333		30	28	29		96.6667					92.0833				81.9444				77.9861				75.2083
																							5.77923				16.1316				6.81021				10.7149
			Day 5																				2.04327				5.70339				2.40777				3.78829
Paired										Unpaired
Rat	Baseline	%		Tone 1	Tone 2	Tone 3		%		Rat	Baseline	%		Tone 1	Tone 2	Tone 3		%
cx504-R2	0	0		24	28	23		83.3333		cx504-R1	0	0		25	28	20	81.1111
cx504-R4	4	13.3333		20	28	23		78.8889		cx504-R3	1	3.33333		28	29	29	95.5556
cx505-R1	0	0		27	28	28		92.2222		cx505-R2	0	0		26	25	20	78.8889
cx505-R3	0	0		17	27	21		72.2222		cx505-R4	7	23.3333		20	30	30	88.8889
cx506-R3	0	0		20	30	21		78.8889		cx506-R1	0	0		21	27	27	83.3333
cx506-R4	0	0		25	29	26		88.8889		cx506-R2	3	10		23	26	30	87.7778
cx507-R1	10	33.3333		26	29	29		93.3333		cx507-R3	4	13.3333		27	20	29	84.4444
cx507-R2	12	40		20	28	29		85.5556		cx507-R4	10	33.3333		29	30	21	88.8889
			Day 6
Paired										Unpaired
Rat	Baseline	%		Tone 1	Tone 2	Tone 3		%		Rat	Baseline	%		Tone 1	Tone 2	Tone 3		%
cx504-R2	0	0		18	12	0		33.3333		cx504-R1	0	0		20	30	20		77.7778
cx504-R4	0	0		12	11	10		36.6667		cx504-R3	10	33.3333		30	27	26		92.2222
cx505-R1	10	33.3333		28	25	26		87.7778		cx505-R2	20	66.6667		29	28	27		93.3333
cx505-R3	0	0		13	6	4		25.5556		cx505-R4	0	0		29	28	27		93.3333
cx506-R3	0	0		16	15	19		55.5556		cx506-R1	0	0		23	30	29		91.1111
cx506-R4	0	0		12	13	9		37.7778		cx506-R2	4	13.3333		25	29	30		93.3333
cx507-R1	0	0		27	20	13		66.6667		cx507-R3	10	33.3333		30	29	29		97.7778
cx507-R2	0	0		13	15	17		50		cx507-R4	0	0		29	30	27		95.5556
		Fig. S4C - Test
			Test
Paired										Unpaired
Rat	Baseline	%		Tone 1	Tone 2	Tone 3		%		Rat	Baseline	%		Tone 1	Tone 2	Tone 3		%
cx504-R2	0	0		11	10	5		28.8889		cx504-R1	0	0		21	30	27		86.6667
cx504-R4	0	0		17	7	10		37.7778		cx504-R3	0	0		17	0	13		33.3333
cx505-R1	7	23.3333		15	16	13		48.8889		cx505-R2	15	50		21	30	30		90
cx505-R3	0	0		7	6	10		25.5556		cx505-R4	10	33.3333		29	27	23		87.7778
cx506-R3	0	0		5	0	3		8.88889		cx506-R1	9	30		19	10	19		53.3333
cx506-R4	0	0		14	11	7		35.5556		cx506-R2	0	0		19	30	17		73.3333
cx507-R1	3	10		18	10	13		45.5556		cx507-R3	0	0		29	28	27		93.3333
cx507-R2	0	0		10	2	10		24.4444		cx507-R4	0	0		15	19	27		67.7778
