# Supplementary material for: Shifting from fear to safety through deconditioning-update
Source: eLife. 2020 Jan 30;9:e51207. doi: 10.7554/eLife.51207 (PMC7021486; doi:10.7554/eLife.51207)
Supplement: Figure 2—source data 1. [file elife-51207-fig2-data1.xlsx]

## Sheet: Figure 2
		Fig. 2B - Reactivations
			Day 41
No Footshock										Footshock
Rat	Baseline	%		Tone 1	Tone 2	Tone 3		%		Rat	Baseline	%		Tone 1	Tone 2	Tone 3		%
cx1-R2	30	100		30	30	30		100		cx1-R3	28	93.3333		28	24	29		90
cx1-R5	29	96.6667		20	30	30		88.8889		cx2-R5	25	83.3333		29	30	29		97.7778
cx2-R3	26	86.6667		30	30	30		100		cx3-R2	30	100		30	30	30		100
cx3-R1	26	86.6667		30	30	30		100		cx3-R4	22	73.3333		29	30	30		98.8889
cx3-R5	29	96.6667		29	29	30		97.7778		cx4-R1	20	66.6667		29	30	30		98.8889
cx4-R2	20	66.6667		29	30	30		98.8889		cx4-R4	28	93.3333		28	30	29		96.6667
cx4-R5	28	93.3333		30	30	30		100
			Day 42
No Footshock										Footshock
Rat	Baseline	%		Tone 1	Tone 2	Tone 3		%		Rat	Baseline	%		Tone 1	Tone 2	Tone 3		%
cx1-R2	23	76.667		28	30	29		96.6667		cx1-R3	7	23.3333		23	22	29		82.2222
cx1-R5	27	90		26	30	30		95.5556		cx2-R5	1	3.3333		25	28	28		90
cx2-R3	27	90		28	30	30		97.7778		cx3-R2	0	0		10	30	29		76.6667
cx3-R1	29	96.667		27	30	30		96.6667		cx3-R4	0	0		23	20	23		73.3333
cx3-R5	17	56.667		17	28	30		83.3333		cx4-R1	11	36.6667		22	22	30		82.2222
cx4-R2	25	83.333		23	30	28		90		cx4-R4	5	16.667		20	28	28		84.4444
cx4-R5	11	36.667		28	12	13		58.8889
			Day 43
No Footshock										Footshock
Rat	Baseline	%		Tone 1	Tone 2	Tone 3		%		Rat	Baseline	%		Tone 1	Tone 2	Tone 3		%
cx1-R2	8	26.6667		26	29	28		92.2222		cx1-R3	0	0		23	19	12		60
cx1-R5	16	53.3333		27	17	28		80		cx2-R5	0	0		19	7	14		44.4444
cx2-R3	15	50		28	30	29		96.6667		cx3-R2	5	16.6667		19	19	13		56.6667
cx3-R1	24	80		28	30	29		96.6667		cx3-R4	14	46.667		16	13	12		45.5556
cx3-R5	3	10		25	30	19		82.2222		cx4-R1	12	40		16	15	27		64.4444
cx4-R2	13	43.3333		22	10	11		47.7778		cx4-R4	21	70		15	19	24		64.4444
cx4-R5	0	0		22	28	27		85.5556
			Day 44
No Footshock										Footshock
Rat	Baseline	%		Tone 1	Tone 2	Tone 3		%		Rat	Baseline	%		Tone 1	Tone 2	Tone 3		%
cx1-R2	27	90		28	29	30		96.6667		cx1-R3	1	3.3333		13	8	15		40
cx1-R5	15	50		22	18	23		70		cx2-R5	0	0		19	19	18		62.2222
cx2-R3	10	33.3333		28	30	30		97.7778		cx3-R2	0	0		17	24	15		62.2222
cx3-R1	4	13.3333		27	30	30		96.6667		cx3-R4	0	0		9	9	9		30
cx3-R5	27	90		29	17	24		77.7778		cx4-R1	7	23.3333		11	27	30		75.5556
cx4-R2	27	90		27	22	13		68.8889		cx4-R4	10	33.3333		23	16	12		56.6667
cx4-R5	14	46.667		28	14	16		64.4444
		Fig. 2C - Test
			Test
Control										Footshock										No Footshock
Rat	Baseline	%		Tone 1	Tone 2	Tone 3		%		Rat	Baseline	%		Tone 1	Tone 2	Tone 3		%		Rat	Baseline	%		Tone 1	Tone 2	Tone 3		%
cx1-R1	27	90		29	29	30		97.7778		cx1-R3	2	6.66667		4	10	3		18.8889		cx1-R2	0	0		12	28	30		77.7778
cx1-R4	23	76.6667		30	30	30		100		cx2-R5	0	0		25	22	17		71.1111		cx1-R5	6	20		22	2	1		27.7778
cx2-R2	27	90		29	29	29		96.6667		cx3-R2	0	0		6	0	2		8.88889		cx2-R3	7	23.3333		20	23	5		53.3333
cx3-R3	30	100		30	30	30		100		cx3-R4	0	0		5	22	3		33.3333		cx3-R1	0	0		23	19	26		75.5556
cx4-R3	30	100		30	30	30		100		cx4-R1	18	60		9	26	21		62.2222		cx3-R5	0	0		1	3	5		10
										cx4-R4	2	6.667		6	17	2		27.7778		cx4-R2	3	10		9	0	1		11.1111
																				cx4-R5	0	0	7.61904	3	0	3		6.66667
																							10.3126
		Fig. 2D - Renewal																					3.89778
			Renewal
Control										Footshock										No Footshock
Rat	Baseline	%		Tone 1	Tone 2	Tone 3		%		Rat	Baseline	%		Tone 1	Tone 2	Tone 3		%		Rat	Baseline	%		Tone 1	Tone 2	Tone 3		%
cx1-R1	24	80		29	30	30		98.8889		cx1-R3	0	0		8	7	12		30		cx1-R2	27	90		27	30	30		96.6667
cx1-R4	29	96.667		29	30	30		98.8889		cx2-R5	0	0		2	5	0		7.77778		cx1-R5	0	0		20	17	10		52.2222
cx2-R2	26	86.667		29	30	30		98.8889		cx3-R2	3	10		5	14	1		22.2222		cx2-R3	12	40		23	26	19		75.5556
cx3-R3	27	90		30	28	29		96.6667		cx3-R4	0	0		0	0	0		0		cx3-R1	2	6.6667		23	28	30		90
cx4-R3	24	80		27	29	30		95.5556		cx4-R1	1	3.3333		7	10	1		20		cx3-R5	0	0		3	4	10		18.8889
										cx4-R4	0	0		6	1	0		7.77778		cx4-R2	0	0		7	27	19		58.8889
																				cx4-R5	0	0		8	19	29		62.2222
		Fig. 2E - Spontaneous Recovery
			Spontaneous Recovery
Control										Footshock										No Footshock
Rat	Baseline	%		Tone 1	Tone 2	Tone 3		%		Rat	Baseline	%		Tone 1	Tone 2	Tone 3		%		Rat	Baseline	%		Tone 1	Tone 2	Tone 3		%
cx1-R1	30	100		28	20	30		86.6667		cx1-R3	11	36.6667		11	0	0		12.2222		cx1-R2	2	6.6667		24	30	30		93.3333
cx1-R4	2	6.6667		22	29	30		90		cx2-R5	4	13.33		15	3	8		28.8889		cx1-R5	28	93.3333		21	19	10		55.5556
cx2-R2	21	70		25	30	30		94.4444		cx3-R2	0	0		8	4	0		13.3333		cx2-R3	14	46.667		25	28	18		78.8889
cx3-R3	7	23.3333		16	29	15		66.6667		cx3-R4	0	0		9	3	10		24.4444		cx3-R1	3	10		21	26	7		60
cx4-R3	14	46.6667		29	30	28		96.6667		cx4-R1	0	0		14	15	3		35.5556		cx3-R5	0	0		17	7	4		31.1111
										cx4-R4	0	0		23	17	12		42.2222		cx4-R2	14	46.667		27	20	18		72.2222
																				cx4-R5	23.3333			16	16	6		57.7778
		Fig. 2G - Reactivations
			Day 3
No Footshock										Footshock
Rat	Baseline	%		Tone 1	Tone 2	Tone 3		%		Rat	Baseline	%		Tone 1	Tone 2	Tone 3		%
cx163-R1	20	66.6667		29	30	30		98.8889		cx163-R2	29	96.667		27	27	29		92.2222
cx164-R2	24	80		28	30	30		97.7778		cx164-R3	22	73.3333		28	30	30		97.7778
cx165-R3	26	86.6667		29	30	30		98.8889		cx164-R4	27	90		29	27	30		95.5556
cx165-R4	28	93.333		24	24	30		86.6667		cx165-R1	17	56.667		27	30	28		94.4444
cx166-R1	17	56.6667		21	29	30		88.8889		cx166-R2	23	76.667		29	29	29		96.6667
cx167-R2	12	40		30	29	29		97.7778		cx166-R3	18	60		29	30	30		98.8889
cx167-R4	23	76.667		28	26	29		92.2222		cx167-R1	25	83.3333		30	30	29		98.8889
			Day 4
No Footshock										Footshock
Rat	Baseline	%		Tone 1	Tone 2	Tone 3		%		Rat	Baseline	%		Tone 1	Tone 2	Tone 3		%
cx163-R1	11	36.667		9	12	19		44.4444		cx163-R2	5	16.6667		15	11	20		51.1111
cx164-R2	26	86.667		11	27	24		68.8889		cx164-R3	15	50		13	20	5		42.2222
cx165-R3	23	76.667		26	27	24		85.5556		cx164-R4	22	73.3333		24	25	14		70
cx165-R4	15	50		20	20	25		72.2222		cx165-R1	3	10		8	16	12		40
cx166-R1	23	76.667		22	21	27		77.7778		cx166-R2	12	40		21	18	16		61.1111
cx167-R2	6	20		2	15	16		36.6667		cx166-R3	6	20		8	26	24		64.4444
cx167-R4	20	66.667		16	11	16		47.7778		cx167-R1	27	90		26	27	28		90
			Day 5
No Footshock										Footshock
Rat	Baseline	%		Tone 1	Tone 2	Tone 3		%		Rat	Baseline	%		Tone 1	Tone 2	Tone 3		%
cx163-R1	9	30		23	26	28		85.5556		cx163-R2	9	30		25	22	2		54.4444
cx164-R2	21	70		25	29	30		93.3333		cx164-R3	14	46.6667		14	6	3		25.5556
cx165-R3	18	60		30	30	29		98.8889		cx164-R4	17	56.667		18	15	16		54.4444
cx165-R4	12	40		29	25	30		93.3333		cx165-R1	0	0		8	4	1		14.4444
cx166-R1	1	3.33333		22	26	29		85.5556		cx166-R2	2	6.6667		20	23	17		66.6667
cx167-R2	7	23.3333		9	24	14		52.2222		cx166-R3	3	10		18	20	0		42.2222
cx167-R4	0	0		19	23	21		70		cx167-R1	17	56.6667		25	26	12		70
			Day 6
No Footshock										Footshock
Rat	Baseline	%		Tone 1	Tone 2	Tone 3		%		Rat	Baseline	%		Tone 1	Tone 2	Tone 3		%
cx163-R1	1	3.3333		20	20	28		75.5556		cx163-R2	2	6.6667		7	4	1		13.3333
cx164-R2	6	20		27	30	29		95.5556		cx164-R3	2	6.667		7	9	3		21.1111
cx165-R3	24	80		28	30	30		97.7778		cx164-R4	8	26.667		16	13	11		44.4444
cx165-R4	5	16.667		24	28	22		82.2222		cx165-R1	0	0		8	0	9		18.8889
cx166-R1	8	26.667		16	28	19		70		cx166-R2	10	33.333		16	12	14		46.6667
cx167-R2	0	0		10	11	12		36.6667		cx166-R3	0	0		8	17	8		36.6667
cx167-R4	0	0		11	3	11		27.7778		cx167-R1	28	93.3333		26	27	29		91.1111
		Fig. 2H - Test
			Test
Control										Footshock										No Footshock
Rat	Baseline	%		Tone 1	Tone 2	Tone 3		%		Rat	Baseline	%		Tone 1	Tone 2	Tone 3		%		Rat	Baseline	%		Tone 1	Tone 2	Tone 3		%
cx163-R3	0	0		27	29	29		94.4444		cx163-R2	6	20		7	2	8		18.8889		cx163-R1	0	0		21	15	23		65.5556
cx163-R4	24	80		29	30	30		98.8889		cx164-R3	0	0		4	1	0		5.55556		cx164-R2	0	0		25	28	28		90
cx164-R1	30	100		29	29	30		97.7778		cx164-R4	1	3.3333		9	15	8		35.5556		cx165-R3	10	33.33		21	30	20		78.8889
cx165-R2	3	10		28	30	30		97.7778		cx165-R1	0	0		1	0	0		1.11111		cx165-R4	0	0		14	22	22		64.4444
cx166-R4	20	66.667		29	30	29		97.7778		cx166-R2	0	0		7	8	10		27.7778		cx166-R1	0	0		20	26	11		63.3333
cx167-R3	30	100		30	29	30		98.8889		cx166-R3	4	13.33		4	8	3		16.6667		cx167-R2	0	0		4	7	10		23.3333
										cx167-R1	23	76.667		17	7	25		54.4444		cx167-R4	3	10		11	8	9		31.1111
		Fig. 2I - Renewal
			renewal
Control										Footshock										No Footshock
Rat	Baseline	%		Tone 1	Tone 2	Tone 3		%		Rat	Baseline	%		Tone 1	Tone 2	Tone 3		%		Rat	Baseline	%		Tone 1	Tone 2	Tone 3		%
cx163-R3	0	0		8	16	9		36.6667		cx163-R2	2	6.66667		5	6	1		13.3333		cx163-R1	15	50		24	24	26		82.2222
cx163-R4	22	73.3333		28	30	30		97.7778		cx164-R3	0	0		1	8	2		12.2222		cx164-R2	5	16.667		27	30	28		94.2222
cx164-R1	16	53.3333		29	29	25		92.2222		cx164-R4	14	46.6667		14	24	17		61.1111		cx165-R3	0	0		22	29	28		87.7778
cx165-R2	28	93.3333		29	30	30		98.8889		cx165-R1	0	0		2	0	0		2.22222		cx165-R4	5	16.667		23	20	29		80
cx166-R4	23	76.6667		27	29	30		95.5556		cx166-R2	0	0		6	8	11		27.7778		cx166-R1	8	26.667		25	28	26		87.7778
cx167-R3	30	100		30	29	30		98.8889		cx166-R3	0	0		4	2	0		6.66667		cx167-R2	2	6.6667		12	13	21		51.1111
										cx167-R1	21	70		26	27	27		88.8889		cx167-R4	15	50		25	23	19		74.4444
		Fig. 2J - Spontaneous Recovery
			Spontaneous Recovery
Control										Footshock										No Footshock
Rat	Baseline	%		Tone 1	Tone 2	Tone 3		%		Rat	Baseline	%		Tone 1	Tone 2	Tone 3		%		Rat	Baseline	%		Tone 1	Tone 2	Tone 3		%
cx163-R3	17	56.667		21	22	24		74.4444		cx163-R2	2	6.6667		6	7	5		20		cx163-R1	17	56.6667		30	30	30		100
cx163-R4	2	6.6667		19	29	24		80		cx164-R3	0	0		9	5	3		18.8889		cx164-R2	22	73.3333		27	29	30		95.5556
cx164-R1	25	83.3333		29	30	29		97.7778		cx164-R4	0	0		11	16	18		50		cx165-R3	17	56.667		29	30	30		98.8889
cx165-R2	29	96.6667		29	30	30		98.8889		cx165-R1	0	0		11	7	9		30		cx165-R4	0	0		24	27	27		86.6667
cx166-R4	23	76.667		29	29	21		87.7778		cx166-R2	0	0		17	15	13		50		cx166-R1	0	0		15	13	25		58.8889
cx167-R3	14	46.667		15	27	29		78.8889		cx166-R3	0	0		11	12	0		25.5556		cx167-R2	18	60		15	19	5		43.3333
										cx167-R1	20	66.667		26	26	20		80		cx167-R4	20	66.667		26	22	17		72.2222

## Sheet: Figure 2-figure supplement 1
		Fig. S5B - Reactivations
			Day 3
No Footshock										Footshock
Rat	Baseline	%		Tone 1	Tone 2	Tone 3		%		Rat	Baseline	%		Tone 1	Tone 2	Tone 3		%
cx1-R3	2	6.6667		20	30	30		88.8889		cx1-R1	5	16.6667		22	29	30		90
cx2-R1	10	33.333		18	26	22		73.3333		cx2-R2	3	10		17	22	29		75.5556
cx2-R4	13	43.333		24	17	30		78.8889		cx2-R5	13	43.333		22	17	29		75.5556
cx3-R2	0	0		15	28	20		70		cx3-R1	2	66.667		18	30	29		85.5556
cx3-R5	0	0		18	30	30		86.6667		cx4-R1	0	0		13	29	28		77.7778
cx4-R3	23	76.667		23	30	27		88.8889		cx4-R5	3	10		20	29	29		86.6667
cx4-R4	13	43.333		25	30	30		94.4444
			Day 4
No Footshock										Footshock
Rat	Baseline	%		Tone 1	Tone 2	Tone 3		%		Rat	Baseline	%		Tone 1	Tone 2	Tone 3		%
cx1-R3	23	76.667		15	30	7		57.7778		cx1-R1	17	56.6667		21	24	18		70
cx2-R1	0	0		8	24	26		64.4444		cx2-R2	0	0		1	1	0		2.2222
cx2-R4	7	23.333		16	23	2		45.5556		cx2-R5	12	40		22	0	20		46.6667
cx3-R2	6	20		15	23	22		66.6667		cx3-R1	10	33.333		14	22	21		63.3333
cx3-R5	24	80		15	26	24		72.2222		cx4-R1	3	10		12	25	7		48.8889
cx4-R3	12	40		3	24	1		31.1111		cx4-R5	20	66.6667		9	22	22		58.8889
cx4-R4	6	20		10	21	26		63.3333
			Day 5
No Footshock										Footshock
Rat	Baseline	%		Tone 1	Tone 2	Tone 3		%		Rat	Baseline	%		Tone 1	Tone 2	Tone 3		%
cx1-R3	18	60		10	13	23		51.1111		cx1-R1	0	0		3	8	0		12.2222
cx2-R1	0	0		17	25	25		74.4444		cx2-R2	0	0		3	3	1		7.77778
cx2-R4	2	6.6667		12	15	22		54.4444		cx2-R5	5	16.667		20	16	16		57.7778
cx3-R2	0	0		14	19	18		56.6667		cx3-R1	11	36.667		18	16	16		55.5556
cx3-R5	17	56.6667		24	30	29		92.2222		cx4-R1	0	0		0	12	9		23.3333
cx4-R3	27	90		19	27	24		77.7778		cx4-R5	18	60		19	12	8		43.3333
cx4-R4	15	50		19	12	15		51.1111
		Fig. S5C - Test
			Test
Control										Footshock										No Footshock
Rat	Baseline	%		Tone 1	Tone 2	Tone 3		%		Rat	Baseline	%		Tone 1	Tone 2	Tone 3		%		Rat	Baseline	%		Tone 1	Tone 2	Tone 3		%
cx1-R2	0	0		22	29	24		83.3333		cx1-R1	0	0		4	8	0		13.3333		cx1-R3	4	13.3333		14	21	12		52.2222
cx1-R4	0	0		28	29	30		96.6667		cx2-R2	0	0		4	0	0		4.44444		cx2-R1	0	0		15	13	20		53.3333
cx1-R5	5	16.6667		18	30	30		86.6667		cx2-R5	0	0		11	0	9		22.2222		cx2-R4	0	0		14	24	2		44.4444
cx2-R3	29	96.667		24	27	26		85.5556		cx3-R1	7	23.333		20	8	4		35.5556		cx3-R2	0	0		8	13	2		25.5556
cx3-R4	8	26.667		26	30	30		95.5556		cx4-R1	0	0		8	13	5		28.8889		cx3-R5	18	60		26	29	30		94.4444
cx4-R2	0	0		29	29	30		97.7778		cx4-R5	2	6.667		16	6	14		40		cx4-R3	19	63.3333		28	27	28		92.2222
																				cx4-R4	5	16.667		20	19	13		57.7778
		Fig. S5C - Renewal
			Renewal
Control										Footshock										No Footshock
Rat	Baseline	%		Tone 1	Tone 2	Tone 3		%		Rat	Baseline	%		Tone 1	Tone 2	Tone 3		%		Rat	Baseline	%		Tone 1	Tone 2	Tone 3		%
cx1-R2	12	40		18	28	27		81.1111		cx1-R1	7	23.333		10	0	0		11.1111		cx1-R3	12	40		11	16	27		60
cx1-R4	3	10		25	30	30		94.4444		cx2-R2	0	0		2	1	0		3.33333		cx2-R1	4	13.3333		4	28	21		58.8889
cx1-R5	0	0		19	22	30		78.8889		cx2-R5	0	0		0	0	1		1.11111		cx2-R4	0	0		1	7	0		8.88889
cx2-R3	22	73.3333		23	24	26		81.1111		cx3-R1	0	0		3	2	1		6.66667		cx3-R2	0	0		2	2	1		5.55556
cx3-R4	26	86.6667		29	27	27		92.2222		cx4-R1	0	0		7	3	2		13.3333		cx3-R5	26	86.6667		19	29	29		85.5556
cx4-R2	2	6.6667		28	21	30		87.7778		cx4-R5	0	0		5	11	0		17.7778		cx4-R3	2	6.6667		26	29	27		91.1111
																				cx4-R4	21	70		12	24	16		57.7778
