# Supplementary material for: Shifting from fear to safety through deconditioning-update
Source: eLife. 2020 Jan 30;9:e51207. doi: 10.7554/eLife.51207 (PMC7021486; doi:10.7554/eLife.51207)
Supplement: Figure 3—source data 1. [file elife-51207-fig3-data1.xlsx]

## Sheet: Figure 3
		Fig. 3B - Reactivations
			Day 3
No Footshock							Footshock
Rat	1st min	2nd min	3rd min		%		Rat	1st min	2nd min	3rd min		%
cx1-R3	48	58	59		92.9167		cx1-R4	40	55	58		85
cx1-R5	18	36	28		50		cx2-R3	37	50	52		77.2222
cx2-R4	48	50	56		88.75		cx2-R5	37	48	52		76.1111
cx3-R1	24	49	58		75.8333		cx3-R2	43	49	46		76.6667
cx3-R3	58	59	60		98.75		cx4-R2	13	54	59		70
cx4-R3	42	60	55		89.1667		cx4-R5	47	47	53		81.6667
cx4-R4	48	44	56		86.25		cx270-R4	30	59	59		82.2222
cx270-R3	17	57	59		73.8889		cx271-R1	3	38	54		52.7778
cx270-R5	19	60	60		77.2222		cx271-R3	7	59	59		69.4444
cx271-R2	19	60	60		77.2222		cx271-R5	6	52	59		65
			Day 4
No Footshock							Footshock
Rat	1st min	2nd min	3rd min		%		Rat	1st min	2nd min	3rd min		%
cx1-R3	40	50	59		82.7778		cx1-R4	22	21	45		48.8889
cx1-R5	24	41	51		64.4444		cx2-R3	45	58	60		90.5556
cx2-R4	57	53	53		90.5556		cx2-R5	26	44	59		71.6667
cx3-R1	28	41	51		66.6667		cx3-R2	31	35	45		61.6667
cx3-R3	57	58	60		97.2222		cx4-R2	27	42	53		67.7778
cx4-R3	28	60	54		78.8889		cx4-R5	40	44	51		75
cx4-R4	31	52	55		76.6667		cx270-R4	17	37	59		62.7778
cx270-R3	20	45	60		69.4444		cx271-R1	0	40	42		45.5556
cx270-R5	40	42	54		75.5556		cx271-R3	0	2	25		15
cx271-R2	37	49	59		45.5556		cx271-R5	0	23	31		30
			Day 5
No Footshock							Footshock
Rat	1st min	2nd min	3rd min		%		Rat	1st min	2nd min	3rd min		%
cx1-R3	36	54	60		83.3333		cx1-R4	2	6	25		18.3333
cx1-R5	13	15	27		30.5556		cx2-R3	27	40	47		63.3333
cx2-R4	39	59	60		87.7778		cx2-R5	26	30	26		45.5556
cx3-R1	36	30	30		53.3333		cx3-R2	28	24	17		38.3333
cx3-R3	57	59	57		96.1111		cx4-R2	30	12	29		39.4444
cx4-R3	35	57	60		84.4444		cx4-R5	34	29	57		66.6667
cx4-R4	25	39	51		63.8889		cx270-R4	0	49	59		60
cx270-R3	0	43	35		43.3333		cx271-R1	9	10	31		27.7778
cx270-R5	5	55	58		65.5556		cx271-R3	5	14	16		19.4444
cx271-R2	14	55	50		66.1111		cx271-R5	0	3	29		17.7778
			Day 6
No Footshock							Footshock
Rat	1st min	2nd min	3rd min		%		Rat	1st min	2nd min	3rd min		%
cx1-R3	5	54	59		65.5556		cx1-R4	5	31	39		41.6667
cx1-R5	13	55	26		52.2222		cx2-R3	29	34	57		66.6667
cx2-R4	28	54	24		58.8889		cx2-R5	0	20	30		27.7778
cx3-R1	15	21	36		40		cx3-R2	1	40	11		28.8889
cx3-R3	37	59	60		86.6667		cx4-R2	1	0	31		17.7778
cx4-R3	48	55	57		88.8889		cx4-R5	0	35	16		28.3333
cx4-R4	18	47	37		56.6667		cx270-R4	0	6	21		15
cx270-R3	0	23	19		23.3333		cx271-R1	0	6	21		15
cx270-R5	0	17	35		28.8889		cx271-R3	0	0	7		3.88889
cx271-R2	0	17	57		41.1111		cx271-R5	0	9	31		22.2222
		Fig. 3C - Test
			Test
Control								Footshock								No Footshock
Rat	1st min	2nd min	3rd min	4th min		%		Rat	1st min	2nd min	3rd min	4th min		%		Rat	1st min	2nd min	3rd min	4th min		%
cx1-R1	38	47	47	58		79.1667		cx1-R4	0	7	14	21		17.5		cx1-R3	13	60	59	60		80
cx2-R1	49	57	55	55		90		cx2-R3	17	57	59	36		70.4167		cx1-R5	3	4	13	2		9.16667
cx2-R2	36	47	49	59		79.5833		cx2-R5	4	0	0	2		2.5		cx2-R4	36	38	53	43		70.8333
cx3-R4	49	58	58	52		90.4167		cx3-R2	1	0	38	38		32.0833		cx3-R1	0	23	35	24		34.1667
cx3-R5	59	60	60	60		99.5833		cx4-R2	0	0	0	15		6.25		cx3-R3	51	60	56	59		94.1667
cx4-R1	30	55	58	59		84.1667		cx4-R5	0	8	30	8		19.1667		cx4-R3	37	42	47	49		72.9167
cx270-R2	12	44	60	58		72.5		cx270-R4	0	0	20	43		26.25		cx4-R4	5	32	36	48		50.4167
cx271-R4	33	55	59	56		84.5833		cx271-R1	0	1	1	6		3.33333		cx270-R3	0	14	14	15		17.9167
								cx271-R3	0	0	0	0		0		cx270-R5	0	2	15	19		15
								cx271-R5	0	0	0	0		0		cx271-R2	10	30	44	32		48.3333
		Fig. 3E - Spontaneous Recovery
			Spontaneous Recovery
Control								Footshock								No Footshock
Rat	1st min	2nd min	3rd min	4th min		%		Rat	1st min	2nd min	3rd min	4th min		%		Rat	1st min	2nd min	3rd min	4th min		%
cx1-R1	31	45	49	40		68.75		cx1-R4	8	2	30	4		18.3333		cx1-R3	46	35	43	21		60.4167
cx2-R1	28	26	26	14		39.1667		cx2-R3	7	11	3	6		11.25		cx1-R5	0	20	27	37		35
cx2-R2	11	42	40	41		55.8333		cx2-R5	15	23	13	5		23.3333		cx2-R4	13	14	27	28		34.1667
cx3-R4	3	7	18	31		24.5833		cx3-R2	7	7	20	28		25.8333		cx3-R1	0	0	1	25		10.8333
cx3-R5	30	42	16	34		50.8333		cx4-R2	0	10	23	9		17.5		cx3-R3	42	45	41	46		72.5
cx4-R1	1	20	42	29		38.3333		cx4-R5	0	24	39	7		29.1667		cx4-R3	40	48	47	52		77.9167
cx270-R2	3	33	48	27		46.25		cx270-R4	0	46	57	55		65.8333		cx4-R4	0	11	41	19		29.5833
cx271-R4	36	60	53	59		86.6667		cx271-R1	5	6	29	16		23.3333		cx270-R3	32	31	50	50		67.9167
								cx271-R3	9	1	10	1		8.75		cx270-R5	33	51	59	35		74.1667
								cx271-R5	0	2	14	25		17.0833		cx271-R2	0	52	57	31		58.3333
		Fig. 3F - Test
		Latency
Control		s		Footshock		s			No Footshock		s
cx37-R2		600		cx37-R3		45			cx37-R1		174
cx38-R1		286		cx38-R2		12			cx37-R4		20
cx38-R4		464		cx59-R1		41			cx38-R3		341
cx59-R3		476		cx59-R4		11			cx59-R2		394
cx60-R2		457		cx60-R3		10			cx60-R1		400
cx61-R2		220		cx61-R1		129			cx60-R4		600
cx62-R1		300		cx61-R4		11			cx61-R3		73
cx63-R1		221		cx62-R3		44			cx62-R2		30
				cx62-R4		52			cx63-R3		14
				cx63-R2		11			cx63-R4		600
		Fig. 3G - Test
		Time in dark compartment
Control		s		Footshock		s			No Footshock		s
cx37-R2		0		cx37-R3		275			cx37-R1		43
cx38-R1		89		cx38-R2		549			cx37-R4		228
cx38-R4		122		cx59-R1		306			cx38-R3		61
cx59-R3		67		cx59-R4		408			cx59-R2		82
cx60-R2		35		cx60-R3		294			cx60-R1		30
cx61-R2		142		cx61-R1		200			cx60-R4		0
cx62-R1		121		cx61-R4		297			cx61-R3		182
cx63-R1		220		cx62-R3		300			cx62-R2		254
				cx62-R4		345			cx63-R3		220
				cx63-R2		305			cx63-R4		0
