# Supplementary material for: Shifting from fear to safety through deconditioning-update
Source: eLife. 2020 Jan 30;9:e51207. doi: 10.7554/eLife.51207 (PMC7021486; doi:10.7554/eLife.51207)
Supplement: Figure 4—source data 1. [file elife-51207-fig4-data1.xlsx]

## Sheet: Figure 4
		Fig. 4B - Extinction Session
				Tone
No Footshock	Baseline	%		1	2	3	4	5	6	7	8	9	10	11	12	13	14	15	16	17	18	19	20	21	22	23	24
cx1-R1	7	23.333		22	30	30	22	17	20	26	20	22	7	15	21	11	0	0	0	0	10	2	0	3	0	0	0
cx1-R4	0	0		26	29	30	30	30	15	11	14	28	24	14	8	13	7	4	28	11	17	24	18	25	14	0	9
cx2-R2	0	0		29	30	30	30	29	30	13	26	10	15	11	10	20	15	27	27	19	26	10	11	1	18	7	5
cx2-R3	24	80		25	30	30	21	28	30	21	30	30	17	13	20	11	21	25	24	22	24	14	11	3	8	4	12
cx34-R2	25	83.3333		18	30	30	30	30	29	24	23	3	20	5	6	10	16	10	4	18	4	10	10	1	3	0	0
cx35-R1	0	0		30	30	30	29	28	29	30	27	22	26	7	18	11	15	3	19	22	15	5	4	0	1	7	0
cx36-R4	2	6.6667		26	27	30	27	27	20	2	3	1	0	0	1	0	0	0	1	10	2	0	0	0	0	0	0
Footshock	Baseline	%		1	2	3	4	5	6	7	8	9	10	11	12	13	14	15	16	17	18	19	20	21	22	23	24
cx1-R2	21	70		21	30	30	30	28	28	29	26	20	27	14	26	21	16	27	23	28	16	28	27	27	25	17	23
cx1-R3	0	0		23	27	30	28	22	21	20	27	19	17	26	28	24	24	27	25	20	16	23	21	27	22	23	26
cx2-R1	27	90		28	29	30	30	30	27	29	22	30	29	30	30	28	30	28	25	30	28	25	29	30	27	27	28
cx2-R4	0	0		30	30	29	30	30	30	30	30	30	30	30	30	29	28	30	29	30	24	28	30	29	29	29	24
cx34-R3	0	0		25	30	30	28	29	27	22	26	15	10	13	17	14	19	15	17	12	15	18	12	19	7	0	9
cx35-R4	2	6.66667		26	30	30	29	28	28	29	29	30	29	27	20	12	22	27	22	21	17	23	25	18	26	29	29
cx36-R2	17	56.6667		18	30	30	15	30	26	30	15	15	22	29	28	29	25	28	29	24	27	29	28	29	20	23	30
No Footshock	T1+T2	T3+T4	T5+T6	T7+T8	T9+T10	T11+T12	T13+T14	T15+T16	T17+T18	T19+T20	T21+T22	T23+T24		Footshock	T1+T2	T3+T4	T5+T6	T7+T8	T9+T10	T11+T12	T13+T14	T15+T16	T17+T18	T19+T20	T21+T22	T23+T24
cx1-R1	86.6667	86.6667	61.6667	76.6667	48.3333	60	18.3333	0	16.6667	3.33333	5	0		cx1-R2	85	100	93.3333	91.6667	78.3333	66.6667	61.6667	83.3333	73.3333	91.6667	86.6667	66.6667
cx1-R4	91.6667	100	75	41.6667	86.6667	36.6667	33.3333	53.3333	46.6667	70	65	15		cx1-R3	83.3333	96.6667	71.6667	78.3333	60	90	80	86.6667	60	73.3333	81.6667	81.6667
cx2-R2	98.3333	100	98.3333	65	41.6667	35	58.3333	90	75	35	31.6667	20		cx2-R1	95	100	95	85	98.3333	100	96.6667	88.3333	96.6667	90	95	91.6667
cx2-R3	91.6667	85	96.6667	85	78.3333	55	53.3333	81.6667	76.6667	41.6667	18.3333	26.6667		cx2-R4	100	98.3333	100	100	100	100	95	98.3333	90	96.6667	96.6667	88.3333
cx34-R2	80	100	98.3333	78.3333	38.3333	18.3333	43.3333	23.3333	36.6667	33.3333	6.66667	0		cx34-R3	91.6667	96.6667	93.3333	80	41.6667	50	55	53.3333	45	50	43.3333	15
cx35-R1	100	98.3333	95	95	80	41.6667	43.3333	36.6667	61.6667	15	1.66667	11.6667		cx35-R4	93.3333	98.3333	93.3333	96.6667	98.3333	78.3333	56.6667	81.6667	63.3333	80	73.3333	96.6667
cx36-R4	88.3333	95	78.3333	8.33333	1.66667	1.66667	0	1.66667	20	0	0	0		cx36-R2	80	75	93.3333	75	61.6667	95	90	95	85	95	81.6667	88.3333
		Fig. 4C - Test
			Test
Control										Footshock										No Footshock
Rat	Baseline	%		Tone 1	Tone 2	Tone 3		%		Rat	Baseline	%		Tone 1	Tone 2	Tone 3		%		Rat	Baseline	%		Tone 1	Tone 2	Tone 3		%
cx34-R1	30	100		30	30	30		100		cx1-R2	22	73.3333		28	30	27		94.4444		cx1-R1	1	3.3333		6	17	5		31.1111
cx34-R4	0	0		24	25	26		83.3333		cx1-R3	13	43.3333		29	27	25		90		cx1-R4	0	0		7	5	6		20
cx35-R2	20	66.6667		22	30	30		91.1111		cx2-R1	28	93.3333		29	30	25		93.3333		cx2-R2	0	0		18	20	4		46.6667
cx35-R3	26	86.6667		29	30	29		97.7778		cx2-R4	20	66.6667		30	30	29		98.8889		cx2-R3	8	26.6667		14	10	0		26.6667
cx36-R1	0	0		29	30	30		98.8889		cx34-R3	0	0		27	22	18		74.4444		cx34-R2	0	0		20	14	4		42.2222
cx36-R3	13	43.3333		20	30	27		85.5556		cx35-R4	0	0		30	30	26		95.5556		cx35-R1	14	46.6667		24	22	8		60
										cx36-R2	26	86.6667		27	30	23		88.8889		cx36-R4	0	0		0	0	0		0
		Fig. 4D - Renewal
			Renewal
Control										Footshock										No Footshock
Rat	Baseline	%		Tone 1	Tone 2	Tone 3		%		Rat	Baseline	%		Tone 1	Tone 2	Tone 3		%		Rat	Baseline	%		Tone 1	Tone 2	Tone 3		%
cx34-R1	19	63.3333		29	30	30		98.8889		cx1-R2	26	86.6667		29	30	29		97.7778		cx1-R1	10	33.3333		17	14	13		48.8889
cx34-R4	7	23.3333		29	30	28		96.6667		cx1-R3	4	13.3333		20	10	24		60		cx1-R4	23	76.6667		30	28	29		96.6667
cx35-R2	28	93.3333		29	30	30		98.8889		cx2-R1	17	56.6667		27	29	23		87.7778		cx2-R2	24	80		30	27	20		85.5556
cx35-R3	21	70		27	30	30		96.6667		cx2-R4	23	76.6667		29	26	30		94.4444		cx2-R3	16	53.3333		25	28	27		88.8889
cx36-R1	29	96.6667		27	30	30		96.6667		cx34-R3	9	30		27	29	19		83.3333		cx34-R2	2	6.66667		28	24	26		86.6667
cx36-R3	19	63.3333		26	30	30		95.5556		cx35-R4	27	90		30	30	18		86.6667		cx35-R1	27	90		29	30	28		96.6667
										cx36-R2	13	43.3333		28	29	26		92.2222		cx36-R4	0	0		24	25	17		73.3333
		Fig. 4E - Spontaneous Recovery
			Spontaneous Recovery
Control										Footshock										No Footshock
Rat	Baseline	%		Tone 1	Tone 2	Tone 3		%		Rat	Baseline	%		Tone 1	Tone 2	Tone 3		%		Rat	Baseline	%		Tone 1	Tone 2	Tone 3		%
cx34-R1	18	60		26	25	23		82.2222		cx1-R2	0	0		18	18	18		60		cx1-R1	0	0		21	3	0		26.6667
cx34-R4	20	66.6667		25	24	23		80		cx1-R3	2	6.6667		23	17	9		54.4444		cx1-R4	0	0		23	19	6		53.3333
cx35-R2	19	63.3333		22	27	25		82.2222		cx2-R1	10	33.3333		19	17	4		44.4444		cx2-R2	14	46.6667		18	18	5		45.5556
cx35-R3	19	63.3333		27	28	14		76.6667		cx2-R4	30	100		28	25	17		77.7778		cx2-R3	0	0		16	27	22		72.2222
cx36-R1	28	93.3333		26	30	30		95.5556		cx34-R3	0	0		23	2	3		31.1111		cx34-R2	0	0		15	25	8		53.3333
cx36-R3	23	76.6667		24	27	18		76.6667		cx35-R4	2	6.6667		26	27	20		81.1111		cx35-R1	6	20		22	18	14		60
										cx36-R2	22	73.3333		25	26	8		65.5556		cx36-R4	3	10		23	29	19		78.8889
		Fig. 4G - Reactivations
			Day 3
No Footshock + Vehicle										No Footshock + Nimodipine										Footshock + Vehicle										Footshock + Nimodipine
Rat	Baseline	%		Tone 1	Tone 2	Tone 3		%		Rat	Baseline	%		Tone 1	Tone 2	Tone 3		%		Rat	Baseline	%		Tone 1	Tone 2	Tone 3		%		Rat	Baseline	%		Tone 1	Tone 2	Tone 3		%
cx1-R4	26	86.667		29	30	30		98.8889		cx1-R3	15	50		28	30	14		80		cx1-R2	21	70		27	29	30		95.5556		cx1-R1	24	80		28	29	26		92.2222
cx2-R3	0	0		26	27	29		91.1111		cx2-R2	26	86.6667		23	19	21		70		cx2-R1	12	40		25	27	29		90		cx1-R5	28	93.3333		26	29	21		84.4444
cx3-R2	30	100		30	30	30		100		cx3-R1	16	53.333		22	29	21		80		cx2-R5	7	23.333		22	29	27		86.6667		cx2-R4	0	0		23	24	30		85.5556
cx4-R1	29	96.667		29	30	30		98.8889		cx3-R5	26	86.667		26	30	30		95.5556		cx3-R4	5	16.6667		20	29	30		87.7778		cx3-R3	16	53.333		28	30	29		96.6667
cx4-R5	15	50		20	28	30		86.6667		cx4-R4	9	30		27	29	30		95.5556		cx4-R3	25	83.333		23	25	30		86.6667		cx4-R2	21	70		22	24	29		83.3333
cx5-R4	21	70		23	29	30		91.1111		cx6-R2	29	96.667		30	30	30		100		cx5-R2	18	60		20	30	30		88.8889		cx5-R1	12	40		28	28	27		92.2222
cx6-R3	7	23.3333		29	25	27		90		cx6-R5	23	76.667		26	29	29		93.3333		cx6-R1	5	16.667		29	28	24		90		cx5-R5	16	53.333		20	28	26		82.2222
																														cx6-R4	15	50		20	29	28		85.5556
			Day 4
No Footshock + Vehicle										No Footshock + Nimodipine										Footshock + Vehicle										Footshock + Nimodipine
Rat	Baseline	%		Tone 1	Tone 2	Tone 3		%		Rat	Baseline	%		Tone 1	Tone 2	Tone 3		%		Rat	Baseline	%		Tone 1	Tone 2	Tone 3		%		Rat	Baseline	%		Tone 1	Tone 2	Tone 3		%
cx1-R4	6	20		20	23	24		74.4444		cx1-R3	17	56.6667		29	30	29		97.7778		cx1-R2	22	73.3333		24	8	27		65.5556		cx1-R1	26	86.667		30	30	29		98.8889
cx2-R3	17	56.667		1	21	4		28.8889		cx2-R2	0	0		21	26	28		83.3333		cx2-R1	12	40		23	24	1		53.3333		cx1-R5	27	90		29	28	23		88.8889
cx3-R2	22	73.333		23	30	29		91.1111		cx3-R1	15	50		22	29	28		87.7778		cx2-R5	7	23.333		0	23	24		52.2222		cx2-R4	0	0		22	25	29		84.4444
cx4-R1	22	73.333		19	30	29		86.6667		cx3-R5	21	70		23	29	28		88.8889		cx3-R4	0	0		12	26	25		70		cx3-R3	6	20		27	26	23		84.4444
cx4-R5	1	3.3333		14	22	28		71.1111		cx4-R4	1	3.3333		20	29	30		87.7778		cx4-R3	15	50		24	24	18		73.3333		cx4-R2	28	93.333		15	29	25		76.6667
cx5-R4	22	73.3333		14	29	29		80		cx6-R2	25	83.3333		30	30	30		100		cx5-R2	14	46.667		13	23	23		65.5556		cx5-R1	16	53.3333		28	24	25		85.5556
cx6-R3	10	33.3333		10	26	21		63.3333		cx6-R5	14	46.667		23	30	29		91.1111		cx6-R1	6	20		22	11	12		50		cx5-R5	0	0		28	25	22		83.3333
																														cx6-R4	22	73.3333		27	29	30		95.5556
			Day 5
No Footshock + Vehicle										No Footshock + Nimodipine										Footshock + Vehicle										Footshock + Nimodipine
Rat	Baseline	%		Tone 1	Tone 2	Tone 3		%		Rat	Baseline	%		Tone 1	Tone 2	Tone 3		%		Rat	Baseline	%		Tone 1	Tone 2	Tone 3		%		Rat	Baseline	%		Tone 1	Tone 2	Tone 3		%
cx1-R4	19	63.3333		26	26	17		76.6667		cx1-R3	19	63.3333		27	30	28		94.4444		cx1-R2	10	33.333		16	12	13		45.5556		cx1-R1	16	53.3333		30	29	29		97.7778
cx2-R3	16	53.333		11	13	2		28.8889		cx2-R2	7	23.3333		18	28	19		72.2222		cx2-R1	0	0		4	22	11		41.1111		cx1-R5	23	76.667		29	23	18		77.7778
cx3-R2	10	33.333		25	29	29		92.2222		cx3-R1	11	36.667		27	26	27		88.8889		cx2-R5	0	0		9	11	0		22.2222		cx2-R4	10	33.3333		20	24	21		72.2222
cx4-R1	22	73.333		18	22	20		66.6667		cx3-R5	0	0		25	28	24		85.5556		cx3-R4	0	0		10	14	14		42.2222		cx3-R3	11	36.667		27	27	25		87.7778
cx4-R5	8	26.667		11	18	5		37.7778		cx4-R4	6	20		21	29	30		88.8889		cx4-R3	9	30		18	21	18		63.3333		cx4-R2	0	0		22	27	24		81.1111
cx5-R4	15	50		21	11	16		53.3333		cx6-R2	10	33.3333		28	30	30		97.7778		cx5-R2	0	0		20	27	28		83.3333		cx5-R1	28	93.333		28	28	23		87.7778
cx6-R3	2	6.667		11	10	4		27.7778		cx6-R5	5	16.667		21	24	28		81.1111		cx6-R1	15	50		16	20	21		63.3333		cx5-R5	0	0		15	29	18		68.8889
																														cx6-R4	25	83.333		29	27	27		92.2222
			Day 6
No Footshock + Vehicle										No Footshock + Nimodipine										Footshock + Vehicle										Footshock + Nimodipine
Rat	Baseline	%		Tone 1	Tone 2	Tone 3		%		Rat	Baseline	%		Tone 1	Tone 2	Tone 3		%		Rat	Baseline	%		Tone 1	Tone 2	Tone 3		%		Rat	Baseline	%		Tone 1	Tone 2	Tone 3		%
cx1-R4	4	13.333		18	23	4		50		cx1-R3	22	73.3333		25	29	29		50		cx1-R2	0	0		12	7	11		33.3333		cx1-R1	23	76.667		27	27	27		90
cx2-R3	0	0		11	23	18		57.7778		cx2-R2	0	0		21	27	12		66.6667		cx2-R1	0	0		12	9	10		34.4444		cx1-R5	26	86.667		29	19	24		80
cx3-R2	0	0		10	27	26		70		cx3-R1	0	0		27	28	20		83.3333		cx2-R5	0	0		2	2	0		4.44444		cx2-R4	3	10		14	21	2		41.1111
cx4-R1	22	73.333		24	22	20		73.3333		cx3-R5	0	0		14	23	20		63.3333		cx3-R4	0	0		14	7	10		34.4444		cx3-R3	28	93.333		29	26	26		90
cx4-R5	2	6.6667		4	5	6		16.6667		cx4-R4	22	73.3333		24	27	3		60		cx4-R3	7	23.3333		24	18	13		61.1111		cx4-R2	0	0		25	23	25		81.1111
cx5-R4	8	26.667		16	10	16		46.6667		cx6-R2	15	50		28	27	27		91.1111		cx5-R2	0	0		8	10	6		26.6667		cx5-R1	13	43.3333		23	27	29		87.7778
cx6-R3	0	0		0	0	0		0		cx6-R5	10	33.333		19	23	19		67.7778		cx6-R1	17	56.667		17	20	0		41.1111		cx5-R5	0	0		21	28	8		63.3333
																														cx6-R4	25	83.3333		21	15	15		56.6667
		Fig. 4H - Test
			Test
No Footshock + Vehicle										No Footshock + Nimodipine										Footshock + Vehicle										Footshock + Nimodipine
Rat	Baseline	%		Tone 1	Tone 2	Tone 3		%		Rat	Baseline	%		Tone 1	Tone 2	Tone 3		%		Rat	Baseline	%		Tone 1	Tone 2	Tone 3		%		Rat	Baseline	%		Tone 1	Tone 2	Tone 3		%
cx1-R4	0	0		22	9	1		35.5556		cx1-R3	21	70		24	21	29		82.2222		cx1-R2	0	0		1	5	2		8.88889		cx1-R1	11	36.667		23	29	30		91.1111
cx2-R3	4	13.333		18	26	18		68.8889		cx2-R2	0	0		14	2	23		43.3333		cx2-R1	0	0		3	10	4		18.8889		cx1-R5	22	73.3333		20	28	14		68.8889
cx3-R2	12	40		25	22	29		84.4444		cx3-R1	0	0		19	22	11		57.7778		cx2-R5	0	0		0	0	0		0		cx2-R4	0	0		5	1	0		6.66667
cx4-R1	26	86.667		26	29	28		92.2222		cx3-R5	16	53.333		20	21	20		67.7778		cx3-R4	0	0		11	5	9		27.7778		cx3-R3	14	46.667		28	15	10		58.8889
cx4-R5	1	3.33333		6	1	20		30		cx4-R4	6	20		10	29	24		70		cx4-R3	3	10		18	19	9		51.1111		cx4-R2	0	0		22	25	26		81.1111
cx5-R4	17	56.667		1	13	2		17.7778		cx6-R2	0	0		24	23	19		73.3333		cx5-R2	0	0		16	26	29		78.8889		cx5-R1	27	90		29	29	27		94.4444
cx6-R3	1	3.333		3	1	3		7.77778		cx6-R5	3	10		15	29	24		75.5556		cx6-R1	0	0		7	5	12		26.6667		cx5-R5	10	33.333		21	10	27		64.4444
																														cx6-R4	0	0		15	17	26		64.4444
		Fig. 4I - Renewal
			Renewal
No Footshock + Vehicle										No Footshock + Nimodipine										Footshock + Vehicle										Footshock + Nimodipine
Rat	Baseline	%		Tone 1	Tone 2	Tone 3		%		Rat	Baseline	%		Tone 1	Tone 2	Tone 3		%		Rat	Baseline	%		Tone 1	Tone 2	Tone 3		%		Rat	Baseline	%		Tone 1	Tone 2	Tone 3		%
cx1-R4	18	60		19	20	10		54.4444		cx1-R3	2	6.6667		13	30	30		81.1111		cx1-R2	5	16.667		0	17	13		33.3333		cx1-R1	25	83.3333		30	29	29		97.7778
cx2-R3	4	13.3333		8	24	7		43.3333		cx2-R2	7	23.3333		27	29	28		93.3333		cx2-R1	6	20		13	7	10		33.3333		cx1-R5	5	16.667		16	29	13		64.4444
cx3-R2	21	70		13	28	19		66.6667		cx3-R1	10	33.3333		19	20	16		61.1111		cx2-R5	0	0		0	0	0		0		cx2-R4	7	23.3333		16	10	11		41.1111
cx4-R1	27	90		29	29	29		96.6667		cx3-R5	0	0		16	25	8		54.4444		cx3-R4	6	20		7	6	11		26.6667		cx3-R3	6	20		13	28	10		56.6667
cx4-R5	0	0		11	17	11		43.3333		cx4-R4	1	3.33333		17	20	18		61.1111		cx4-R3	2	6.667		8	18	12		42.2222		cx4-R2	0	0		26	22	16		71.1111
cx5-R4	15	50		12	13	27		57.7778		cx6-R2	1	3.33333		23	13	24		66.6667		cx5-R2	0	0		9	17	4		33.3333		cx5-R1	8	26.667		26	21	29		84.4444
cx6-R3	5	16.667		22	25	23		77.7778		cx6-R5	0	0		18	18	30		73.3333		cx6-R1	17	56.667		9	0	0		10		cx5-R5	22	73.3333		15	28	29		80
																														cx6-R4	25	83.3333		25	29	29		92.2222
		Fig. 4J - Spontaneous Recovery
			Spontaneous Recovery
No Footshock + Vehicle										No Footshock + Nimodipine										Footshock + Vehicle										Footshock + Nimodipine
Rat	Baseline	%		Tone 1	Tone 2	Tone 3		%		Rat	Baseline	%		Tone 1	Tone 2	Tone 3		%		Rat	Baseline	%		Tone 1	Tone 2	Tone 3		%		Rat	Baseline	%		Tone 1	Tone 2	Tone 3		%
cx1-R4	8	26.667		15	4	2		23.3333		cx1-R3	17	56.667		19	27	12		64.4444		cx1-R2	14	46.6667		12	12	6		33.3333		cx1-R1	11	36.667		24	28	28		88.8889
cx2-R3	23	76.667		18	20	22		66.6667		cx2-R2	0	0		23	13	19		61.1111		cx2-R1	0	0		0	17	1		20		cx1-R5	5	16		14	7	11		35.5556
cx3-R2	8	26.667		16	27	30		81.1111		cx3-R1	3	10		19	14	20		58.8889		cx2-R5	0	0		3	0	0		3.3333		cx2-R4	10	33.333		18	20	25		70
cx4-R1	20	66.667		28	30	29		96.6667		cx3-R5	0	0		26	26	15		74.4444		cx3-R4	0	0		10	13	4		30		cx3-R3	7	23.333		20	27	23		77.7778
cx4-R5	9	30		18	25	22		72.2222		cx4-R4	0	0		19	24	25		75.5556		cx4-R3	7	23.333		27	23	0		55.5556		cx4-R2	0	0		20	25	21		73.3333
cx5-R4	2	6.667		14	24	10		53.3333		cx6-R2	0	0		18	28	24		77.7778		cx5-R2	4	13.333		0	19	0		21.1111		cx5-R1	12	40		18	27	5		55.5556
cx6-R3	7	23.333	36.6669	20	7	14		45.5556		cx6-R5	11	36.667	14.762	24	29	29		91.1111		cx6-R1	14	46.667		8	7	1		17.7778		cx5-R5	5	16.667		18	13	4		38.8889
			25.2397										22.8408																	cx6-R4	27	90		29	29	28		95.5556
			9.5397										8.63299

## Sheet: Figure 4-figure supplement 1
		Fig. S6B - Extinction Session
				tones
No Footshock	Baseline	%		1	2	3	4	5	6	7	8	9	10	11	12
cx310-R2	28	93.333		30	30	30	30	30	30	30	26	24	25	25	29
cx310-R4	10	33.333		28	30	28	30	15	29	30	10	15	3	7	6
cx311-R3	30	100		24	30	30	18	18	11	10	18	24	24	21	20
cx312-R1	0	0		27	30	30	30	30	27	30	29	25	26	21	7
cx312-R2	0	0		28	30	30	30	30	30	30	30	30	30	29	27
cx313-R3	0	0		23	30	30	30	30	30	11	13	1	1	0	0
cx314-R4	14	46.667		20	30	30	30	30	30	27	20	30	18	22	24
Footshock	Baseline	%		1	2	3	4	5	6	7	8	9	10	11	12
cx310-R3	29	96.667		27	22	30	28	30	21	24	21	23	21	5	30
cx311-R1	2	6.667		30	30	29	30	24	24	29	29	28	20	28	20
cx311-R2	24	80		26	30	2	29	0	28	24	19	10	30	29	23
cx311-R4	0	0		16	27	26	25	23	27	23	11	2	0	30	27
cx312-R3	30	100		29	30	30	30	26	29	30	24	29	19	17	26
cx313-R2	25	83.333		11	22	30	29	30	29	28	30	20	28	17	20
cx314-R1	0	0		29	30	30	30	28	30	30	30	29	29	29	25
No Footshock	T1+T2	T3+T4	T5+T6	T7+T8	T9+T10	T11+T12			Footshock	T1+T2	T3+T4	T5+T6	T7+T8	T9+T10	T11+T12
cx310-R2	100	100	100	93.3333	81.6667	90			cx310-R3	81.6667	96.6667	85	75	73.3333	58.3333
cx310-R4	96.6667	96.6667	73.3333	66.6667	30	21.6667			cx311-R1	100	98.3333	80	96.6667	80	80
cx311-R3	90	80	48.3333	46.6667	80	68.3333			cx311-R2	93.3333	51.6667	46.6667	71.6667	66.6667	86.6667
cx312-R1	95	100	95	98.3333	85	46.6667			cx311-R4	71.6667	85	83.3333	56.6667	3.33333	95
cx312-R2	96.6667	100	100	100	100	93.3333			cx312-R3	98.3333	100	91.6667	90	80	71.6667
cx313-R3	88.3333	100	100	40	3.33333	0			cx313-R2	55	98.3333	98.3333	96.6667	80	61.6667
cx314-R4	83.3333	100	100	78.3333	80	76.6667			cx314-R1	98.3333	100	96.6667	100	96.6667	90
		Fig. S6C - Test
			Test
Control										Footshock										No Footshock
Rat	Baseline	%		Tone 1	Tone 2	Tone 3		%		Rat	Baseline	%		Tone 1	Tone 2	Tone 3		%		Rat	Baseline	%		Tone 1	Tone 2	Tone 3		%
cx310-R1	0	0		22	30	30		91.1111		cx310-R3	0	0		25	25	27		85.5556		cx310-R2	0	0		28	30	30		97.7778
cx312-R4	22	73.3333		30	30	30		100		cx311-R1	3	10		26	27	27		88.8889		cx310-R4	0	0		24	26	10		66.6667
cx313-R1	0	10		29	30	30		98.8889		cx311-R2	0	0		29	30	28		96.6667		cx311-R3	6	20		24	29	28		90
cx313-R4	0	0		27	30	30		96.6667		cx311-R4	0	0		8	0	5		14.4444		cx312-R1	0	0		28	30	30		97.7778
cx314-R2	29	96.6667		29	30	29		97.7778		cx312-R3	25	83.3333		28	28	26		91.1111		cx312-R2	28	93.3333		28	30	30		97.7778
cx314-R3	20	66.6667		21	30	30		90		cx313-R2	29	96.6667		26	30	28		93.3333		cx313-R3	30	100		23	23	1		52.2222
										cx314-R1	7	23.3333		26	29	29		93.3333		cx314-R4	20	66.6667		29	30	30		98.8889
		Fig. S6C - Renewal
			Renewal
Control										Footshock										No Footshock
Rat	Baseline	%		Tone 1	Tone 2	Tone 3		%		Rat	Baseline	%		Tone 1	Tone 2	Tone 3		%		Rat	Baseline	%		Tone 1	Tone 2	Tone 3		%
cx310-R1	12	40		29	30	30		98.8889		cx310-R3	0	0		26	27	14		74.4444		cx310-R2	20	66.6667		29	30	30		98.8889
cx312-R4	20	66.6667		22	30	30		91.1111		cx311-R1	0	0		21	12	3		40		cx310-R4	0	0		23	20	28		78.8889
cx313-R1	13	43.3333		28	30	30		97.7778		cx311-R2	20	66.6667		28	29	30		96.6667		cx311-R3	0	0		27	26	30		92.2222
cx313-R4	0	0		30	30	29		98.8889		cx311-R4	0	0		9	26	9		48.8889		cx312-R1	0	0		28	30	30		97.7778
cx314-R2	29	96.6667		29	30	29		97.7778		cx312-R3	0	0		27	28	27		91.1111		cx312-R2	0	0		22	28	29		87.7778
cx314-R3	10	33.3333		26	30	15		78.8889		cx313-R2	0	0		15	26	15		62.2222		cx313-R3	0	0		29	30	29		97.7778
										cx314-R1	7	23.3333		29	27	30		95.5556		cx314-R4	20	66.6667		29	28	28		94.4444
		Fig. S6C - Spontaneous Recovery
			Spontaneous Recovery
Control										Footshock										No Footshock
Rat	Baseline	%		Tone 1	Tone 2	Tone 3		%		Rat	Baseline	%		Tone 1	Tone 2	Tone 3		%		Rat	Baseline	%		Tone 1	Tone 2	Tone 3		%
cx310-R1	27	90		29	30	30		98.8889		cx310-R3	0	0		14	14	0		31.1111		cx310-R2	25	83.3333		22	30	30		91.1111
cx312-R4	0	0		18	18	10		51.1111		cx311-R1	0	0		15	19	10		48.8889		cx310-R4	0	0		4	6	2		13.3333
cx313-R1	18	60		22	17	26		72.2222		cx311-R2	17	56.6667		10	27	21		64.4444		cx311-R3	25	83.3333		21	19	9		54.4444
cx313-R4	11	36.6667		20	28	18		73.3333		cx311-R4	1	3.33333		17	8	7		35.5556		cx312-R1	11	36.6667		26	18	4		53.3333
cx314-R2	30	100		30	28	28		95.5556		cx312-R3	26	86.6667		24	10	4		44.4444		cx312-R2	18	60		23	15	2		42.2222
cx314-R3	0	0		7	21	6		37.7778		cx313-R2	24	80		18	12	9		43.3333		cx313-R3	21	70		18	0	0		20
										cx314-R1	20	66.6667		18	21	6		50		cx314-R4	11	36.667		10	17	1		31.1111

## Sheet: Figure 4-figure supplement 2
		Fig. S7B - Reactivation
			Day 3
Footshock + Vehicle										Footshock + Nimodipine
Rat	Baseline	%		Tone 1	Tone 2	Tone 3		%		Rat	Baseline	%		Tone 1	Tone 2	Tone 3		%
cx549-R2	24	80		25	28	29		91.1111		cx549-R1	0	0		25	30	29		93.3333		52	56	51		88.3333		84.127
cx549-R4	27	90		28	29	26		92.2222		cx549-R3	24	80		29	28	29		95.5556		50	59	49		87.7778		11.7644
cx550-R1	21	70		29	28	27		93.3333		cx550-R2	0	0		21	30	29		88.8889		58	54	56		93.3333		3.14416
cx551-R3	29	96.6667		27	27	28		91.1111		cx550-R3	0	0		30	29	27		95.5556		56	50	45		83.8889
cx552-R2	17	56.6667		28	28	27		92.2222		cx550-R4	20	66.6667		26	29	30		94.4444		57	57	52		92.2222
cx553-R1	27	90		29	29	29		96.6667		cx551-R1	29	96.6667		28	29	28		94.4444		51	58	31		77.7778
										cx551-R2	24	80		24	29	30		92.2222		55	55	54		91.1111
		84.7222		50	55	55		88.8889		cx551-R4	20	66.6667		29	28	29		95.5556		58	53	49		88.8889
		6.77459		55	51	52		87.7778		cx552-R1	25	83.3333		28	29	29		95.5556		50	57	57		91.1111
		2.76571		52	56	34		78.8889		cx552-R3	27	90		29	29	29		96.6667		58	57	54		93.8889
				50	49	36		75		cx552-R4	10	33.3333		27	29	27		92.2222		57	54	50		89.4444
				55	47	50		84.4444		cx553-R2	4	13.3333		24	29	29		91.1111		51	50	36		76.1111
				58	53	57		93.3333		cx553-R3	12	40		26	29	30		94.4444		54	52	27		73.8889
										cx553-R4	27	90		30	27	28		94.4444		47	20	23		50
			Day 4
Footshock + Vehicle										Footshock + Nimodipine
Rat	Baseline	%		Tone 1	Tone 2	Tone 3		%		Rat	Baseline	%		Tone 1	Tone 2	Tone 3		%
cx549-R2	12	40		23	28	27		86.6667		cx549-R1	19	63.3333		28	28	23		87.7778		57	51	35		79.4444		83.9683
cx549-R4	20	66.6667		27	27	28		91.1111		cx549-R3	18	60		27	28	27		91.1111		55	50	54		88.3333		4.04073
cx550-R1	22	73.3333		23	24	25		80		cx550-R2	27	90		27	29	28		93.3333		55	54	58		92.7778		1.07993
cx551-R3	26	86.6667		26	30	27		92.2222		cx550-R3	20	66.6667		26	28	28		91.1111		47	59	49		86.1111
cx552-R2	21	70		27	29	27		92.2222		cx550-R4	15	50		29	20	29		86.6667		50	47	47		80
cx553-R1	28	93.3333		28	28	29		94.4444		cx551-R1	28	93.3333		28	25	28		90		55	50	40		80.5556
										cx551-R2	27	90		27	27	27		90		50	47	55		84.4444
		79.1667		56	57	50		90.5556		cx551-R4	20	66.6667		27	26	23		84.4444		50	51	52		85
		9.82407		52	49	41		78.8889		cx552-R1	27	90		28	29	23		88.8889		57	47	49		85
		4.01066		46	27	37		61.1111		cx552-R3	25	83.3333		27	28	21		84.4444		58	52	40		83.3333
				54	56	40		83.3333		cx552-R4	26	86.6667		29	28	25		91.1111		57	55	47		88.3333
				57	50	41		82.2222		cx553-R2	20	66.6667		25	27	29		90		50	57	42		82.7778
				54	32	56		78.8889		cx553-R3	15	50		25	27	25		85.5556		52	49	45		81.1111
										cx553-R4	25	83.3333		28	29	27		93.3333		49	42	50		78.3333
			Day 5
Footshock + Vehicle										Footshock + Nimodipine
Rat	Baseline	%		Tone 1	Tone 2	Tone 3		%		Rat	Baseline	%		Tone 1	Tone 2	Tone 3		%
cx549-R2	7	23.3333		20	23	27		77.7778		cx549-R1	7	23.3333		28	29	27		93.3333		55	50	56		89.4444		80.8333
cx549-R4	10	33.3333		18	28	28		82.2222		cx549-R3	17	56.6667		25	26	29		88.8889		50	37	50		76.1111		7.52252
cx550-R1	11	36.6667		19	13	7		43.3333		cx550-R2	18	60		24	26	27		85.5556		49	44	40		73.8889		2.01048
cx551-R3	25	83.3333		28	28	27		92.2222		cx550-R3	3	10		25	28	21		82.2222		55	58	50		90.5556
cx552-R2	19	63.3333		21	28	23		80		cx550-R4	27	90		23	27	28		86.6667		55	57	55		92.7778
cx553-R1	19	63.3333		28	28	28		93.3333		cx551-R1	20	66.6667		25	28	29		91.1111		57	50	51		87.7778
										cx551-R2	19	63.3333		26	27	28		90		42	50	43		75
		70.0926		40	50	47		76.1111		cx551-R4	10	33.3333		18	30	29		85.5556		49	50	39		76.6667
		24.8686		41	50	39		72.2222		cx552-R1	27	90		29	30	28		96.6667		52	38	50		77.7778
		10.1526		23	10	5		21.1111		cx552-R3	26	86.6667		27	29	30		95.5556		39	50	44		73.8889
				53	57	32		78.8889		cx552-R4	15	50		20	29	28		85.5556		50	55	49		85.5556
				54	48	43		80.5556		cx553-R2	7	23.3333		26	30	27		92.2222		39	48	37		68.8889
				56	52	57		91.6667		cx553-R3	20	66.6667		23	27	29		87.7778		50	51	39		77.7778
										cx553-R4	10	33.3333		24	28	23		83.3333		55	52	47		85.5556
			Day 6
Footshock + Vehicle										Footshock + Nimodipine
Rat	Baseline	%		Tone 1	Tone 2	Tone 3		%		Rat	Baseline	%		Tone 1	Tone 2	Tone 3		%
cx549-R2	5	16.6667		5	17	10		35.5556		cx549-R1	0	0		15	10	18		47.7778		30	37	7		41.1111		30.6746
cx549-R4	7	23.3333		10	15	10		38.8889		cx549-R3	0	0		20	26	20		73.3333		15	23	3		22.7778		12.5238
cx550-R1	0	0		7	0	10		18.8889		cx550-R2	0	0		10	17	20		52.2222		30	20	19		38.3333		3.34713
cx551-R3	10	33.3333		18	15	20		58.8889		cx550-R3	0	0		20	21	15		62.2222		27	20	30		42.7778
cx552-R2	15	50		23	7	12		46.6667		cx550-R4	17	56.6667		13	17	18		53.3333		10	20	30		33.3333
cx553-R1	13	43.3333		20	10	8		42.2222		cx551-R1	20	66.6667		20	18	19		63.3333		0	20	15		19.4444
										cx551-R2	5	16.6667		17	27	15		65.5556		0	5	10		8.33333
		9.62963		3	8	3		7.77778		cx551-R4	0	0		19	15	10		48.8889		19	15	15		27.2222
		6.74644		20	12	7		21.6667		cx552-R1	8	26.6667		9	7	15		34.4444		12	18	5		19.4444
		2.75422		0	5	0		2.77778		cx552-R3	10	33.3333		17	20	20		63.3333		15	30	27		40
				3	3	7		7.22222		cx552-R4	10	33.3333		13	10	17		44.4444		20	13	29		34.4444
				0	7	3		5.55556		cx553-R2	0	0		15	25	20		66.6667		0	19	7		14.4444
				3	10	10		12.7778		cx553-R3	13	43.3333		27	20	28		83.3333		29	20	13		34.4444
										cx553-R4	7	23.3333		20	27	23		77.7778		40	37	19		53.3333
		Fig. S7C - Test 1
			Test 1
Footshock + Vehicle										Footshock + Nimodipine
Rat	Baseline	%		Tone 1	Tone 2	Tone 3		%		Rat	Baseline	%		Tone 1	Tone 2	Tone 3		%
cx549-R2	0	0		2	18	0		22.2222		cx549-R1	0	0		20	20	11		56.6667		13	5	3	11.6667	20	10	40	38.8889
cx549-R4	0	0		13	5	7		27.7778		cx549-R3	0	0		16	18	9		47.7778		0	3	0	1.66667	3	20	10	18.3333
cx550-R1	0	0		0	5	7		13.3333		cx550-R2	10	33.3333		16	16	20		57.7778		10	0	17	15	17	30	10	31.6667
cx551-R3	0	0		12	14	13		43.3333		cx550-R3	0	0		20	21	10		56.6667		7	0	0	3.88889	30	10	7	26.1111
cx552-R2	3	10		10	13	7		33.3333		cx550-R4	0	0		17	27	26		77.7778
cx553-R1	10	33.3333		7	15	10		35.5556		cx551-R1	0	0		27	27	24		86.6667		0	0	0	0	0	20	5	13.8889
										cx551-R2	13	43.3333		21	23	19		70		19	10	7	20	10	17	10	20.5556
										cx551-R4	10	33.3333		20	10	17		52.2222		10	2	7	10.5556	30	27	19	42.2222
										cx552-R1	10	33.3333		19	25	23		74.4444		20	15	20	30.5556	27	21	17	36.1111
										cx552-R3	8	26.6667		15	20	30		72.2222
										cx552-R4	9	30		20	19	23		68.8889		30	29	40	55
										cx553-R2	7	23.3333		20	20	7		52.2222		20	7	10	20.5556
										cx553-R3	9	30		23	21	10		60		10	5	13	15.5556
										cx553-R4	0	0		17	27	9		58.8889		13	17	7	20.5556
		Fig. S7C - Test 2
			Test 2
Footshock + Vehicle										Footshock + Nimodipine
Rat	Baseline	%		Tone 1	Tone 2	Tone 3		%		Rat	Baseline	%		Tone 1	Tone 2	Tone 3		%
cx549-R2	0	0		0	3	7		11.1111		cx549-R1	10	33.3333		22	28	12		68.8889
cx549-R4	0	0		1	4	10		16.6667		cx549-R3	0	0		19	15	23		63.3333
cx550-R1	0	0		0	0	0		0		cx550-R2	0	0		17	18	16		56.6667
cx551-R3	0	0		14	13	10		41.1111		cx550-R3	3	10		18	17	13		53.3333
cx552-R2	0	0		6	14	0		22.2222		cx550-R4	0	0		15	19	27		67.7778
cx553-R1	10	33.3333		20	12	10		46.6667		cx551-R1	3	10		20	23	20		70
										cx551-R2	0	0		19	20	23		68.8889
										cx551-R4	7	23.3333		18	19	15		57.7778
										cx552-R1	12	40		23	30	24		85.5556
										cx552-R3	0	0		17	13	10		44.4444
										cx552-R4	0	0		20	17	20		63.3333
										cx553-R2	0	0		23	17	19		65.5556
										cx553-R3	7	23.3333		21	15	10		51.1111
										cx553-R4	0	0		27	28	22		85.5556
		Fig. S6B - # of Crossings
Vehicle					Nimodipine
Rat	Crossings				Rat	Crossing (s)
cx59-R1	131				cx59-R2	118
cx59-R4	118				cx59-R3	104
cx60-R2	110				cx60-R1	83
cx60-R3	130				cx60-R4	103
cx61-R1	140				cx61-R2	137
cx61-R3	95				cx61-R4	133
cx62-R2	126				cx62-R1	119
cx62-R4	78				cx62-R3	96
cx63-R1	97				cx63-R3	117
cx63-R2	103				cx63-R4	111
		Fig. S6C - % Time in Periphery
Vehicle					Nimodipine
Rat	Time in Periphery				Rat	Time in Periphery
	s	%				s	%
cx59-R1	255	85			cx59-R2	238	79.3333
cx59-R4	249	83			cx59-R3	252	84
cx60-R2	264	88			cx60-R1	207	69
cx60-R3	269	89.6667			cx60-R4	268	89.3333
cx61-R1	256	85.3333			cx61-R2	269	89.6667
cx61-R3	284	94.6667			cx61-R4	270	90
cx62-R2	270	90			cx62-R1	260	86.6667
cx62-R4	272	90.6667			cx62-R3	241	80.3333
cx63-R1	263	87.6667			cx63-R3	268	89.3333
cx63-R2	249	83			cx63-R4	274	91.3333
